# Supplementary material for: Three-dimensional growth of breast cancer cells potentiates the anti-tumor effects of unacylated ghrelin and AZP-531
Source: eLife journal article supplement (doi:10.7554/elife.56913), 2020-07-15
Supplement: fig2-data2 [file elife-56913-fig2-data2-v1.pdf]

Figure 2

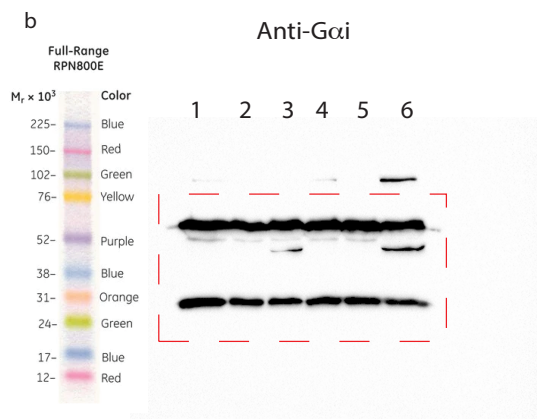

Condition:

Lane 1: Vehicle control 1 (-)\_Time 0

Lane 2: UAG\_Time 1hr

Lane 3: UAG\_Time 2hrs

Lane 4: UAG\_Time 6hrs

Lane 5: Melatonin\_Time 0.5hr

Lane 6: Melatonin\_Time 2hr

MW of Gαi 40 kDa

The indicated cropped area of the blot is shown in the manuscript data.

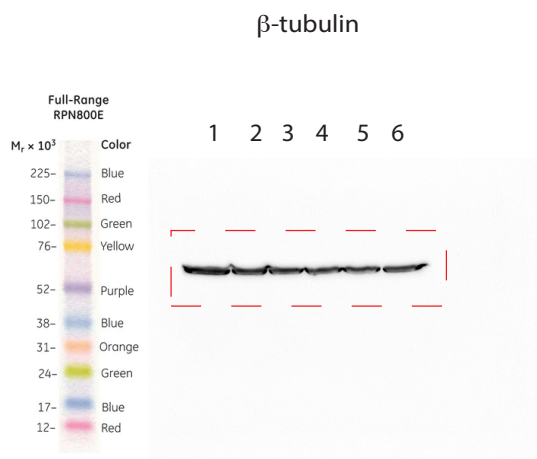

Condition:

Lane 1: Vehicle control 1 (-)\_Time 0

Lane 2: UAG\_Time 1hr

Lane 3: UAG\_Time 2hrs

Lane 4: UAG\_Time 6hrs

Lane 5: Melatonin\_Time 0.5hr

Lane 6: Melatonin\_Time 2hr

MW of β-tubulin 55 kDa

The indicated cropped area of the blot is shown in the manuscript data.

The precipitated active Gai was immunoblotted with an anti-Gai antibody . Bound antibodies were revealed with HRP conjugated secondary antibodies (1:2000) using SuperSignal West pico chemiluminescent solution (Pierce, Rockford, IL). The same blot was then stripped and reprobed with β-tubulin ; used as a control).
