# Supplementary material for: Three-dimensional growth of breast cancer cells potentiates the anti-tumor effects of unacylated ghrelin and AZP-531
Source: eLife journal article supplement (doi:10.7554/elife.56913), 2020-07-15
Supplement: fig4-data2 [file elife-56913-fig4-data2-v1.pdf]

Figure 4

9

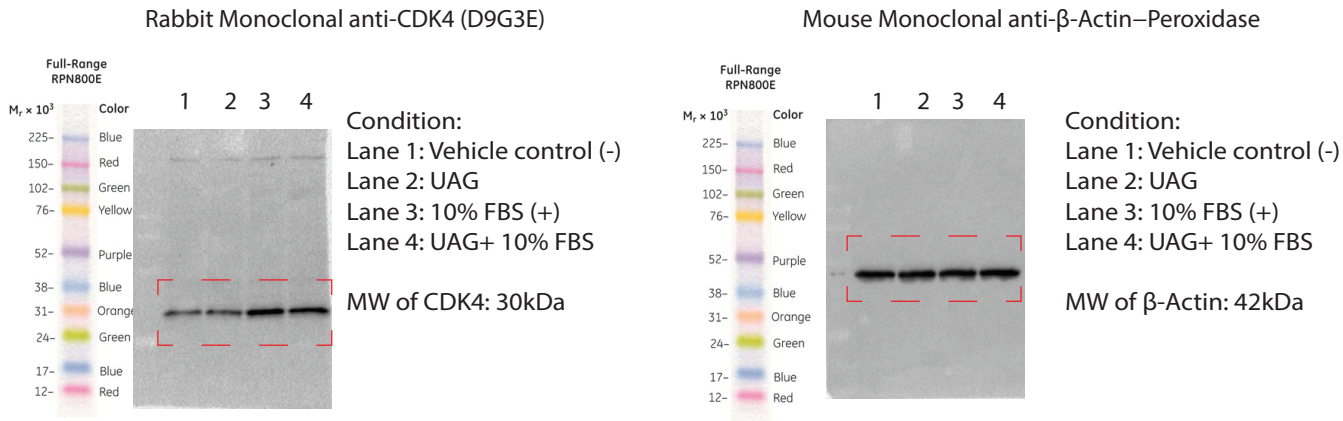

We first probed the blot with Rabbit Monoclonal anti-CDK4 (D9G3E) (detected endogenous levels of total CDK4 protein). The same blot was then stripped and reprobed with Mouse Monoclonal anti-β-Actin–Peroxidase (used as a loading control). The indicated cropped area of the blot is shown in the manuscript data.

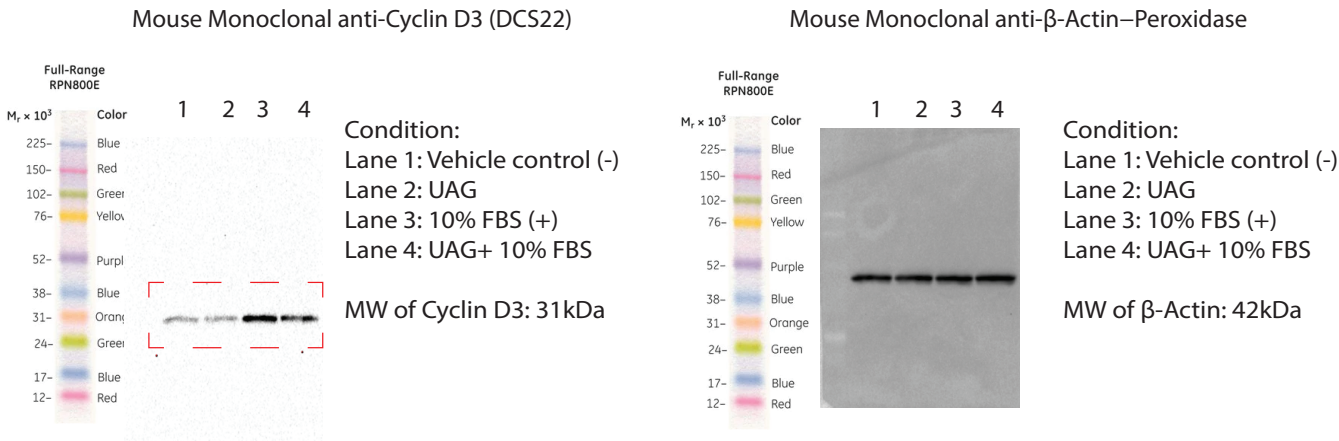

We first probed the blot with Mouse Monoclonal anti-Cyclin D3 (DCS22) (detected endogenous levels of total Cyclin D3 protein). The same blot was then stripped and reprobed with Mouse Monoclonal anti-β-Actin–Peroxidase (used as a loading control). The indicated cropped area of the blot is shown in the manuscript data.

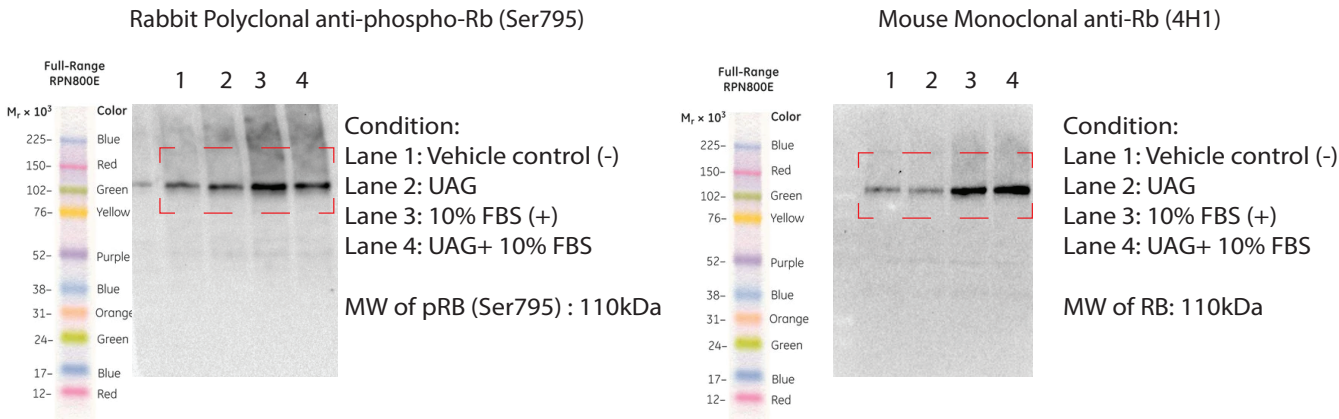

We first probed the blot with Rabbit Polyclonal anti-phospho-Rb (Ser795) (detected endogenous levels of Rb only when phosphorylated at Ser795).The same blot was then stripped and reprobed with Mouse Monoclonal anti-Rb (4H1) (detected endogenous levels of total Rb protein;used as a control). The indicated cropped area of the blot is shown in the manuscript data.

Figure 4

9

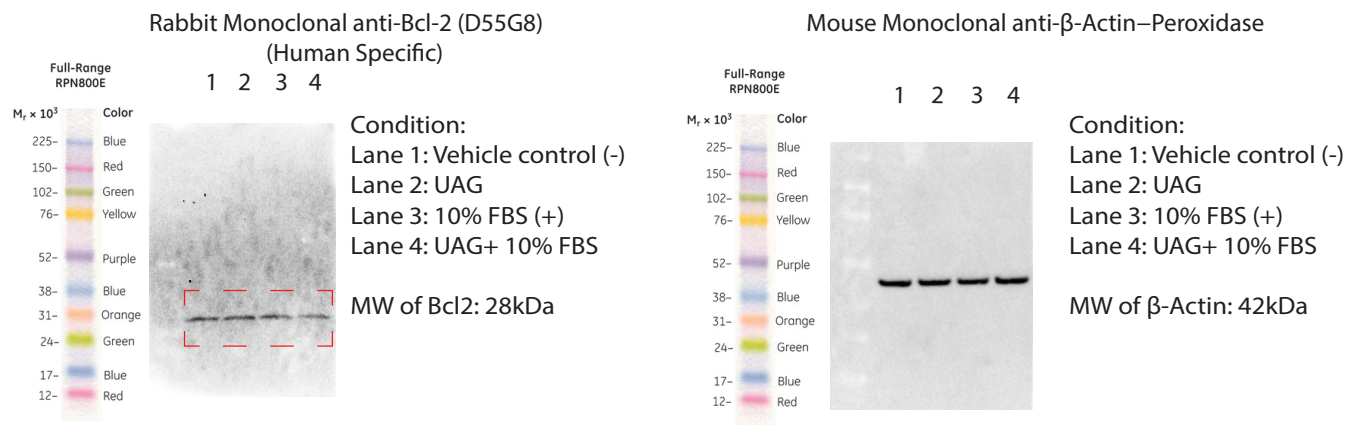

We first probed the blot with Rabbit Monoclonal anti-Bcl-2 (D55G8) (Human Specific) (detected endogenous levels of Bcl-2 only when phosphorylated at threonine 56). The same blot was then stripped and reprobed with Mouse Monoclonal anti-β-Actin–Peroxidase (used as a loading control). The indicated cropped area of the blot is shown in the manuscript data.

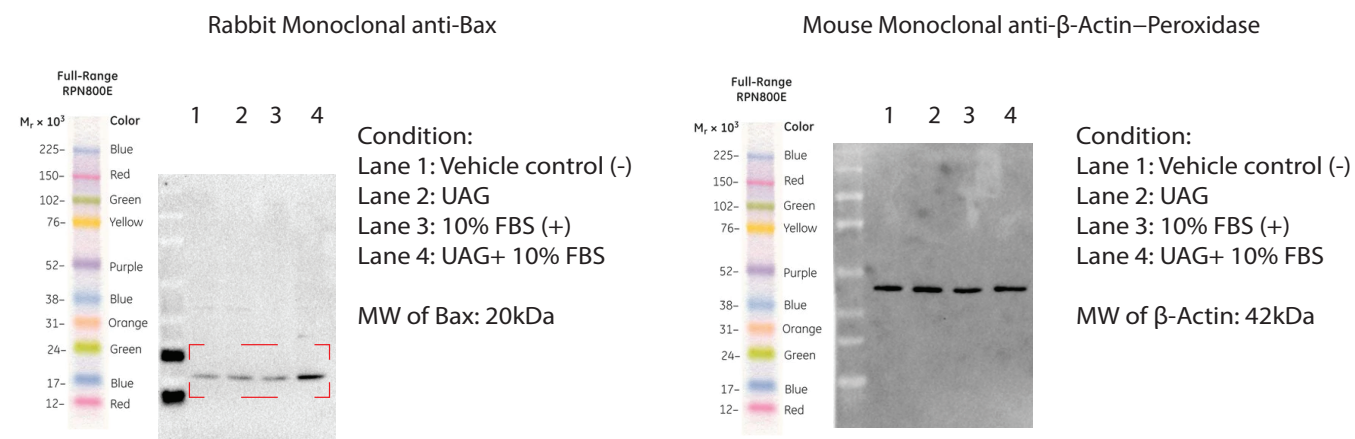

We first probed the blot with Rabbit Monoclonal anti-Bax (detected endogenous levels of total Bax protein). The same blot was then stripped and reprobed with Mouse Monoclonal anti-β-Actin–Peroxidase (used as a loading control). The indicated cropped area of the blot is shown in the manuscript data.

Figure 4

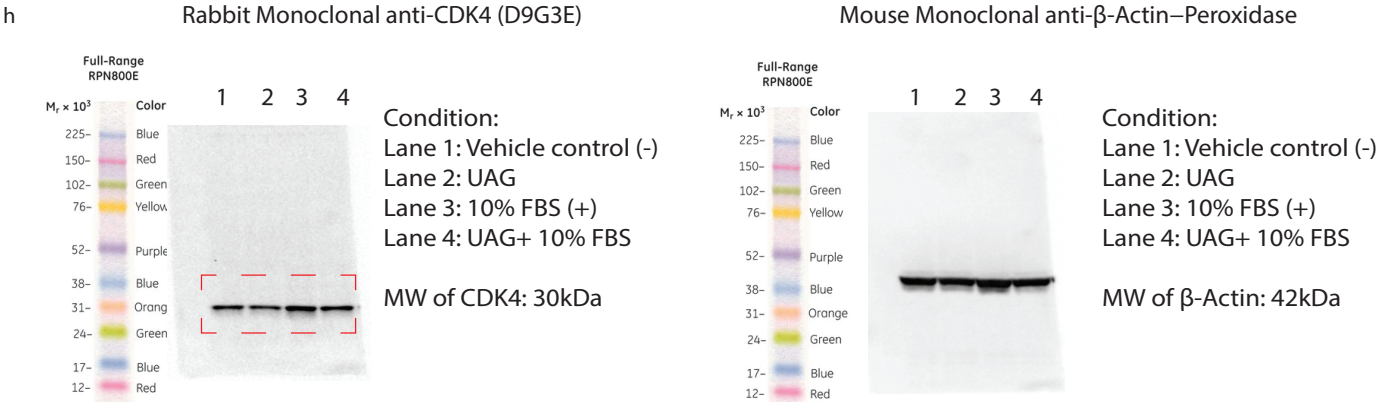

We first probed the blot with Rabbit Monoclonal anti-CDK4 (D9G3E) (detected endogenous levels of total CDK4 protein). The same blot was then stripped and reprobed with Mouse Monoclonal anti- $\beta$ -Actin-Peroxidase (used as a loading control). The indicated **cropped** area of the blot is shown in the manuscript data.

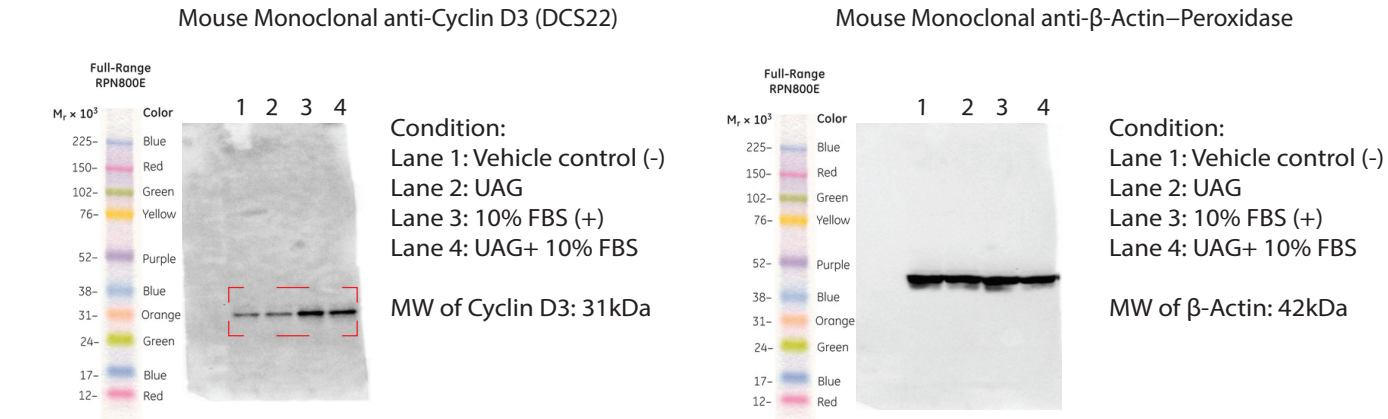

We first probed the blot with Mouse Monoclonal anti-Cyclin D3 (DCS22) (detected endogenous levels of total Cyclin D3 protein). The same blot was then stripped and reprobed with Mouse Monoclonal anti- $\beta$ -Actin-Peroxidase (used as a loading control). The indicated **cropped** area of the blot is shown in the manuscript data.

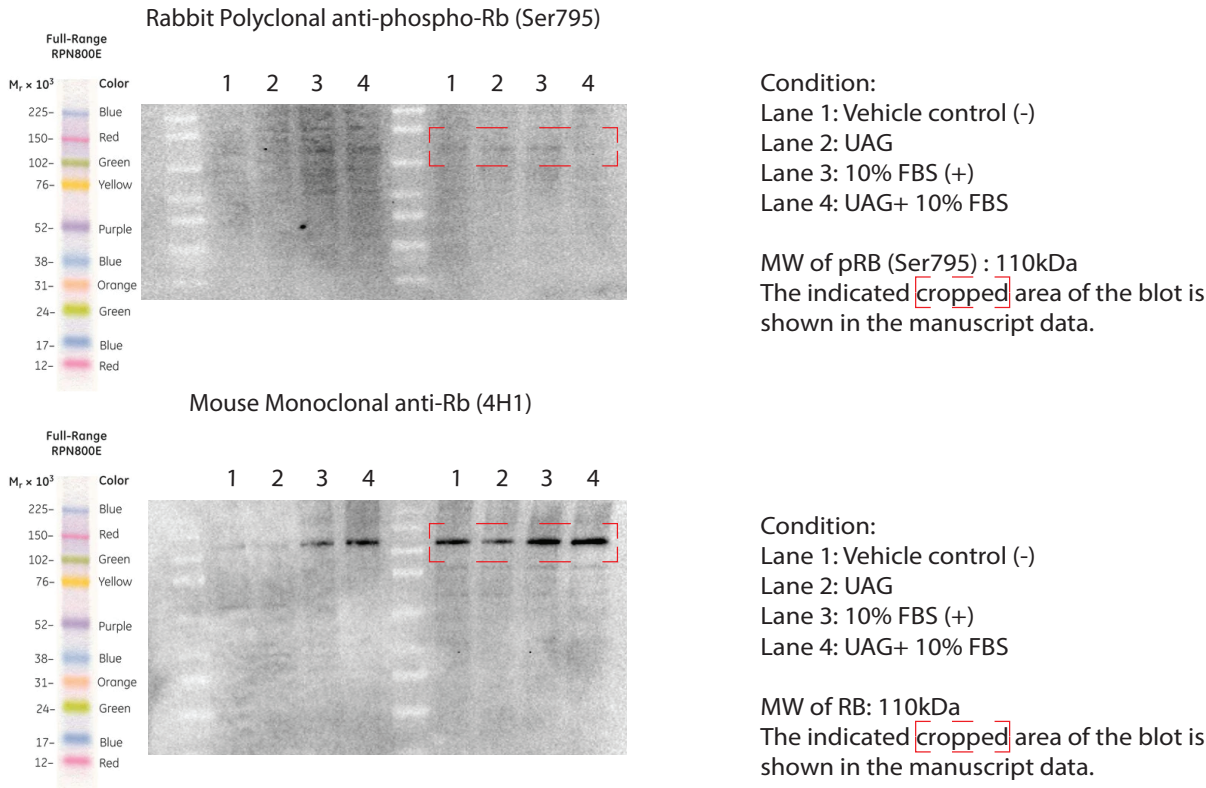

We first probed the blot with Rabbit Polyclonal anti-phospho-Rb (Ser795) (detected endogenous levels of Rb only when phosphorylated at Ser795).The same blot was then stripped and reprobed with Mouse Monoclonal anti-Rb (4H1) (detected endogenous levels of total Rb protein;used as a control). The indicated **cropped** area of the blot is shown in the manuscript data.

Figure 4

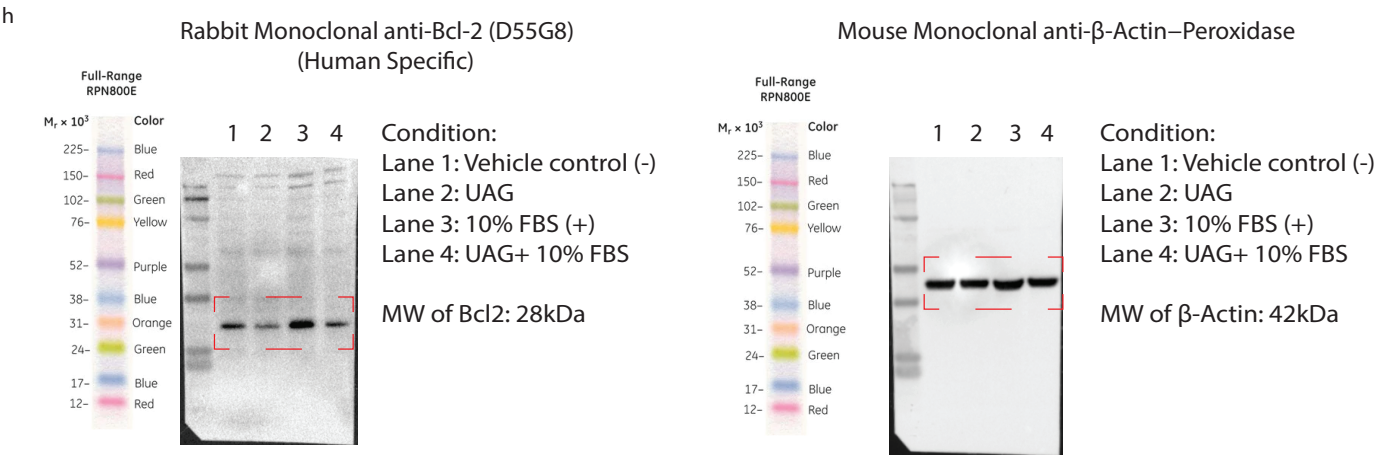

We first probed the blot with Rabbit Monoclonal anti-Bcl-2 (D55G8) (Human Specific) (detected endogenous levels of Bcl-2 only when phosphorylated at threonine 56). The same blot was then stripped and reprobed with Mouse Monoclonal anti- $\beta$ -Actin-Peroxidase (used as a loading control). The indicated cropped area of the blot is shown in the manuscript data.

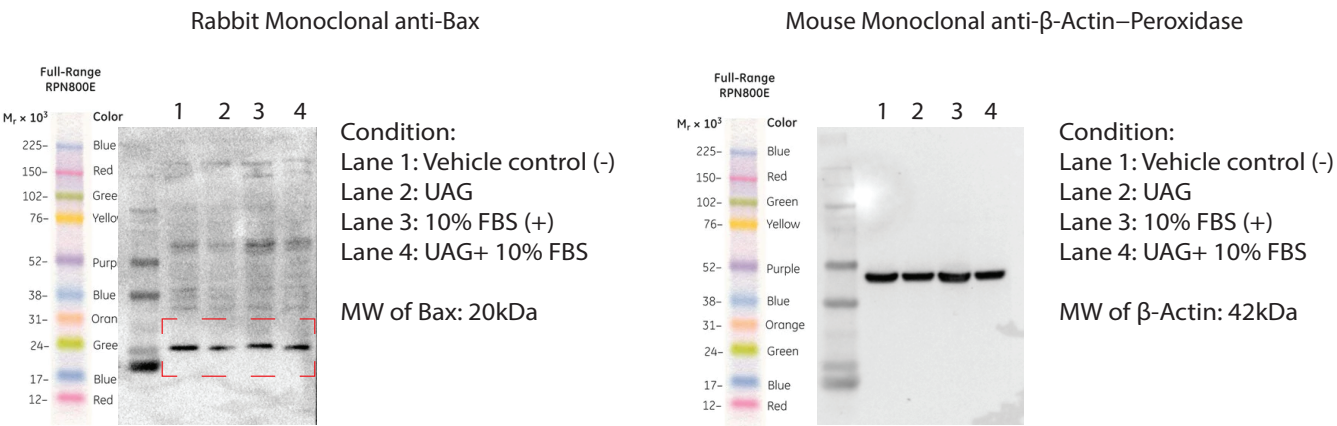

We first probed the blot with Rabbit Monoclonal anti-Bax (detected endogenous levels of total Bax protein). The same blot was then stripped and reprobed with Mouse Monoclonal anti- $\beta$ -Actin-Peroxidase (used as a loading control). The indicated cropped area of the blot is shown in the manuscript data.
