# Supplementary material for: Three-dimensional growth of breast cancer cells potentiates the anti-tumor effects of unacylated ghrelin and AZP-531
Source: eLife. 2020 Jul 15;9:e56913. doi: 10.7554/eLife.56913 (PMC7363447; doi:10.7554/eLife.56913)
Supplement: Figure 1—figure supplement 1—source data 1. [file elife-56913-fig1-figsupp1-data1.xlsx]

## Sheet: Figure S1a 
Raw data	2D				Matrigel				collagen
MCF7	VC	UAG	CM	CM+UAG	VC	UAG	CM	CM+UAG	VC	UAG	CM	CM+UAG
	8206	12820	13944	13968	4130	7721	15285	8547	521	802	837	724
	7588	12605	15656	13951	4382	7368	15512	6045	577	845	849	601
	7373	10968	14421	12321	6193	8465	14434	7439	655	821	969	629
			14673.7				15077				885
	2D				Matrigel				collagen
	VC	UAG	CM	CM+UAG	VC	UAG	CM	CM+UAG	VC	UAG	CM	CM+UAG
in %	0	100	0	100	0	100	0	100	0	100	0	100
	55.9233	87.3674	95.0273	95.1909	27.3927	51.2105	101.38	56.689	58.8701	90.6215	94.5763	81.8079
	51.7117	85.9022	106.695	95.0751	29.0641	48.8691	102.885	40.0942	65.1977	95.4802	95.9322	67.9096
	50.2465	74.7461	98.2781	83.9667	41.0758	56.1451	95.7352	49.34	74.0113	92.7684	109.492	71.0734
Validation
	55.9233	87.3674	95.0274	95.1909	27.3927	51.2105	101.38	56.689	58.8701	90.6215	94.5763	81.8079
	51.7117	85.9022	106.695	95.0751	29.0641	48.8691	102.885	40.0942	65.1977	95.4802	95.9322	67.9096
	50.2465	74.7461	98.2781	83.9667	41.0758	56.1451	95.7352	49.3401	74.0113	92.7684	109.492	71.0734

## Sheet: Figure S1b 
Raw data	2D				Matrigel				collagen
MDA-MB-468	VC	UAG	CM	CM+UAG	VC	UAG	CM	CM+UAG	VC	UAG	CM	CM+UAG
	2652	2967	5789	5049	868	885	17900	1259	254	242	1567	1244
	2517	3406	6025	4470	1064	1685	14200	951	217	261	1749	854
	1933	3319	6207	5202	1182	1034	15400	845	237	331	1849	1216
			6007				15833.3				1721.67
	2D				Matrigel				collagen
	VC	UAG	CM	CM+UAG	VC	UAG	CM	CM+UAG	VC	UAG	CM	CM+UAG
	0	100	0	100	0	100	0	100	0	100	0	100
	44.1485	49.3924	96.3709	84.0519	5.48211	5.58947	113.053	7.95158	14.7531	14.0561	91.0164	72.2555
	41.9011	56.7005	100.3	74.4132	6.72	10.6421	89.6842	6.00632	12.6041	15.1597	101.588	49.6031
	32.1791	55.2522	103.329	86.599	7.46526	6.53053	97.2632	5.33684	13.7657	19.2255	107.396	70.6292
Validation
	44.1485	49.3924	96.3709	84.0519	5.48211	5.58947	113.053	7.95158	14.7531	14.0561	91.0165	72.2556
	41.9011	56.7005	100.3	74.4132	6.72	10.6421	89.6842	6.00632	12.6041	15.1597	101.588	49.6031
	32.1791	55.2522	103.329	86.599	7.46526	6.53053	97.2632	5.33684	13.7657	19.2256	107.396	70.6292

## Sheet: Figure S1c 
Raw data	2D				Matrigel				collagen
MDA-MB-231	VC	UAG	CM	CM+UAG	VC	UAG	CM	CM+UAG	VC	UAG	CM	CM+UAG
	1879	3082	5962	7937	484	394	3431	3174	355	224	1304	1595
	2529	3982	8499	4888	720	501	4008	3108	249	230	1502	1843
	1741	3784	7994	5691	448	403	2746	3425	245	217	1321	1855
			7485				3395				1375.67
	2D				Matrigel				collagen
	VC	UAG	CM	CM+UAG	VC	UAG	CM	CM+UAG	VC	UAG	CM	CM+UAG
in %	0	100	0	100	0	100	0	100	0	100	0	100
	25.1035	41.1757	79.6526	106.039	14.2563	11.6053	101.06	93.4904	25.8057	16.283	94.7904	115.944
	33.7876	53.1997	113.547	65.3039	21.2077	14.757	118.056	91.5464	18.1003	16.7192	109.183	133.971
	23.2599	50.5544	106.8	76.0321	13.1959	11.8704	80.8837	100.884	17.8095	15.7742	96.0262	134.844
Validation
	25.1035	41.1757	79.6526	106.039	14.2563	11.6053	101.06	93.4904	25.8057	16.283	94.7904	115.944
	33.7876	53.1997	113.547	65.3039	21.2077	14.757	118.056	91.5464	18.1003	16.7192	109.183	133.971
	23.2599	50.5544	106.8	76.0321	13.1959	11.8704	80.8837	100.884	17.8095	15.7742	96.0262	134.844

## Sheet: Figure S1d 
Raw data													Validation
MCF7	Dose response			[UAG]M												[UAG]M
	UAG	VC	10% FBS	1e-18	1e-16	1e-15	1e-13	1e-12	1e-10	1e-09	1e-07			VC	10% FBS	1e-18	1e-16	1e-15	1e-13	1e-12	1e-10	1e-09	1e-07
		3023	8748	7047	5720	5549	3768	5591	3635						8525
		4298	8068	7210	6281	5106	4172	3891	4874					35.4604	102.616	82.6628	67.0968	65.0909	44.1994	65.5836	42.6393
		3824	8759	7000	5112	5239	4886	5280	4037					50.4164	94.6393	84.5748	73.6774	59.8944	48.9384	45.6422	57.173
														44.8563	102.745	82.1114	59.9648	61.4545	57.3138	61.9355	47.3548
				[DOX]M												[DOX]M
		VC	10% FBS	1.5×10-13	1.5×10-12	1.5×10-11	1.5×10-10	1.5×10-9	1.5×10-8	1.5×10-7	1.5×10-6			VC	10% FBS	1.5×10-13	1.5×10-12	1.5×10-11	1.5×10-10	1.5×10-9	1.5×10-8	1.5×10-7	1.5×10-6
		4013	7300	7924	6481	4193	4519	3408	3517	2601	2074				8735.33
		4044	8901	9678	7664	4891	4506	4282	3328	2543	2673			45.9399	83.5686	90.7121	74.1929	48.0005	51.7324	39.014	40.2618	29.7756	23.7427
		3008	10005	7898	6269	4243	5092	4299	3171	2200	1592			46.2947	101.897	110.791	87.7356	55.991	51.5836	49.0193	38.0981	29.1117	30.5999
														34.4349	114.535	90.4144	71.766	48.5728	58.292	49.2139	36.3008	25.1851	18.2248
	in %			UAG			doxorubicin
			1e-25	102.616	94.6393	102.745
			1e-18	82.6628	84.5748	82.1114
			1e-16	67.0968	73.6774	59.9648
			1e-15	65.0909	59.8944	61.4545
			1e-13	44.1994	48.9384	57.3138
			1e-12	65.5836	45.6422	61.9355
			1e-10	42.6393	57.173	47.3548
			1e-09
			1e-07
			1e-25				83.5687	101.897	114.535
			1.5e-13				90.7121	110.791	90.4144
			1.5e-12				74.193	87.7357	71.766
			1.5e-11				48.0005	55.991	48.5729
			1.5e-10				51.7325	51.5836	58.292
			1.5e-09				39.014	49.0193	49.2139
			1.5e-08				40.2618	38.0982	36.3009
			1.5e-07				29.7756	29.1117	25.1851
			1.5e-06				23.7427	30.5999	18.2248

## Sheet: Figure S1e 
Raw data													Validation
MDA-MB-468	Dose response			[UAG]M												[UAG]M
	UAG set 1	VC	10% FBS	1e-18	1e-16	1e-15	1e-13	1e-12	1e-10	1e-09	1e-07			VC	10% FBS	1e-18	1e-16	1e-15	1e-13	1e-12	1e-10	1e-09	1e-07
		2008	8987	6317	4197	4197	3782	2550	3588						8644.67
		2197	10542	7010	3736	3695	4425	2876	3461					23.2282	103.96	73.074	48.5502	48.5502	43.7495	29.498	41.5054
		2401	6405	5800	5824	3447	4376	3332	3193					25.4145	121.948	81.0905	43.2174	42.7431	51.1876	33.2691	40.0362
														27.7744	74.0919	67.0934	67.371	39.8743	50.6208	38.544	36.9361
				[DOX]M												[DOX]M
		VC	10% FBS	1.5×10-13	1.5×10-12	1.5×10-11	1.5×10-10	1.5×10-9	1.5×10-8	1.5×10-7	1.5×10-6			VC	10% FBS	1.5×10-13	1.5×10-12	1.5×10-11	1.5×10-10	1.5×10-9	1.5×10-8	1.5×10-7	1.5×10-6
		1552	3658	2713	1651	1274	1067	1014	760	623	494				3626.33
		1517	3664	2680	1750	1267	1124	988	744	635	474			42.7981	100.873	74.8139	45.5281	35.1319	29.4237	27.9621	20.9578	17.1799	13.6226
		1500	3557	2641	1890	1363	1078	802	778	722	471			41.8329	101.039	73.9039	48.2581	34.9389	30.9955	27.2452	20.5166	17.5108	13.0711
														41.3641	98.0881	72.8284	52.1188	37.5862	29.727	22.116	21.4542	19.9099	12.9883
		In %		UAG			doxorubicin
			1e-25	103.96	121.948	74.0919
			1e-18	73.0739	81.0905	67.0934
			1e-16	48.5502	43.2174	67.371
			1e-15	48.5502	42.7431	39.8743
			1e-13	43.7495	51.1876	50.6208
			1e-12	29.498	33.2691	38.544
			1e-10	41.5054	40.0362	36.9361
			1e-09
			1e-07
			1e-25				100.873	101.039	98.0881
			1.5e-13				74.8139	73.9039	72.8285
			1.5e-12				45.5281	48.2582	52.1188
			1.5e-11				35.1319	34.9389	37.5862
			1.5e-10				29.4237	30.9955	29.727
			1.5e-09				27.9622	27.2452	22.116
			1.5e-08				20.9578	20.5166	21.4542
			1.5e-07				17.1799	17.5108	19.9099
			1.5e-06				13.6226	13.0711	12.9883

## Sheet: Figure S1f
Raw data													Validation
MDA-MB 231	Dose response			[UAG]M												[UAG]M
	UAG set 1	VC	10% FBS	1e-18	1e-16	1e-15	1e-13	1e-12	1e-10	1e-09	1e-07			VC	10% FBS	1e-18	1e-16	1e-15	1e-13	1e-12	1e-10	1e-09	1e-07
		3652	7392		9062	7037	7708	7112	9390	7094	9810				8346
		3483	8428		9982	8073	7176	8911	8163	8539	8461			43.7575	88.5694		108.579	84.3158	92.3556	85.2145	112.509	84.9988	117.541
		4024	9218		7910	7612	9667	8817	6840	9237	7779			41.7326	100.983		119.602	96.729	85.9813	106.77	97.8073	102.312	101.378
														48.2147	110.448		94.7759	91.2054	115.828	105.643	81.9554	110.676	93.2063
				[DOX]M												[DOX]M
		VC	10% FBS	1.5×10-13	1.5×10-12	1.5×10-11	1.5×10-10	1.5×10-9	1.5×10-8	1.5×10-7	1.5×10-6			VC	10% FBS	1.5×10-13	1.5×10-12	1.5×10-11	1.5×10-10	1.5×10-9	1.5×10-8	1.5×10-7	1.5×10-6
		394	1364	1081	1086	710	699	330	151	83	58				1424
		501	1599	1243	931	864	595	223	171	64	52			27.6685	95.7865	75.9129	76.264	49.8596	49.0871	23.1742	10.6039	5.82865	4.07303
		403	1309	1110	1011	828	493	445	136	68	47			35.1826	112.289	87.2893	65.3792	60.6742	41.7837	15.6601	12.0084	4.49438	3.65169
														28.3006	91.9242	77.9494	70.9972	58.1461	34.6208	31.25	9.55056	4.77528	3.30056
		In %		UAG			doxorubicin
			1e-25	88.5694	100.983	110.448
			1e-18
			1e-16	108.579	119.602	94.7759
			1e-15	84.3158	96.729	91.2054
			1e-13	92.3556	85.9813	115.828
			1e-12	85.2145	106.77	105.643
			1e-10	112.509	97.8073	81.9554
			1e-09	84.9988	102.312	110.676
			1e-07	117.541	101.378	93.2063
			1e-25				100	100	100
			1.5e-13				95.7865	112.289	91.9242
			1.5e-12				75.9129	87.2893	77.9494
			1.5e-11				76.264	65.3792	70.9972
			1.5e-10				49.8596	60.6742	58.1461
			1.5e-09				49.0871	41.7837	34.6208
			1.5e-08				23.1742	15.6601	31.25
			1.5e-07				10.6039	12.0084	9.55056
			1.5e-06				5.82865	4.49438	4.77528
							4.07303	3.65169	3.30056

## Sheet: Figure S1g
Raw data
	VC	AG	UAG	VC	AG	UAG
	428	530	597	1575	700	627
	438	561	599	1471	747	626
	510	574	610	1151	839	694
