# Supplementary material for: Three-dimensional growth of breast cancer cells potentiates the anti-tumor effects of unacylated ghrelin and AZP-531
Source: eLife. 2020 Jul 15;9:e56913. doi: 10.7554/eLife.56913 (PMC7363447; doi:10.7554/eLife.56913)
Supplement: Figure 1—source data 1. [file elife-56913-fig1-data1.xlsx]

## Sheet: Figure 1a
Figure 1a		MCF7				T47D				LCC2				ZR75				SKBR3
Cell number count		VC	UAG	CM	CM+UAG	VC	UAG	CM	CM+UAG	VC	UAG	CM	CM+UAG	VC	UAG	CM	CM+UAG	VC	UAG	CM	CM+UAG
Raw data		1250	1222	1774	1254	2122	3217	5097	1185	1118	1657	4038	1918	251	676	1122	375	933	1109	2117	1082
		668	1960	2346	1384	1978	2826	4926	2557	869	1541	4282	2016	408	564	958	544	1034	1117	2630	1161
		955	1468	2430	1034	1402	2758	3639	3432	654	1617	3505	1711	259	670	1595	658	1135	1118	3218	918
				2183.33				4554				3941.67				1225				2655
		3418	5088	7934	4539	1250	3418	4959	2150	1617	1955	8045	1770	750	945	2788	912	386	380	705	410
		3603	5525	6591	6770	1096	2613	7074	2673	1140	2671	6913	2750	832	1056	3162	983	311	368	984	512
		4033	4490	9489	6044	1071	3371	7264	2568	1341	2051	6690	2457	988	1047	2606	921	283	517	1122	372
				8004.67				6432.33				7216				2852				937
		MCF7				T47D				LCC2				ZR75				SKBR3
		VC	UAG	CM	CM+UAG	VC	UAG	CM	CM+UAG	VC	UAG	CM	CM+UAG	VC	UAG	CM	CM+UAG	VC	UAG	CM	CM+UAG
% CM		0	100	0	100	0	100	0	100	0	100	0	100	0	100	0	100	0	100	0	100
		57.2519	55.9695	81.2519	57.4351	46.5964	70.6412	111.924	26.0211	28.3636	42.0381	102.444	48.6596	20.4898	55.1837	91.5918	30.6122	35.1412	41.7702	79.7363	40.7533
		30.5954	89.771	107.45	63.3893	43.4344	62.0553	108.169	56.1484	22.0465	39.0951	108.634	51.1459	33.3061	46.0408	78.2041	44.4082	38.9454	42.0716	99.0584	43.7288
		43.7405	67.2366	111.298	47.3588	30.7861	60.5621	79.9078	75.3623	16.592	41.0232	88.9218	43.408	21.1429	54.6939	130.204	53.7143	42.7495	42.1092	121.205	34.5763
		42.7001	63.5629	99.1172	56.7044	19.4331	53.1378	77.0949	33.4249	22.4085	27.0926	111.488	24.5288	26.2973	33.1346	97.756	31.9776	41.1953	40.555	75.2401	43.7567
		45.0112	69.0222	82.3395	84.5757	17.0389	40.6229	109.976	41.5557	15.7982	37.015	95.801	38.1098	29.1725	37.0266	110.87	34.467	33.191	39.2743	105.016	54.6425
		50.3831	56.0923	118.543	75.506	16.6503	52.4071	112.93	39.9233	18.5837	28.423	92.7106	34.0493	34.6424	36.7111	91.3745	32.2931	30.2028	55.1761	119.744	39.7012
Validation
		57.2519	55.9695	81.2519	57.4351	46.5964	70.6412	111.924	26.0211	28.3636	42.0381	102.444	48.6596	20.4898	55.1837	91.5918	30.6122	35.1412	41.7702	79.7363	40.7533
		30.5954	89.771	107.45	63.3893	43.4343	62.0553	108.169	56.1484	22.0465	39.0951	108.634	51.1459	33.3061	46.0408	78.2041	44.4082	38.9454	42.0716	99.0584	43.7288
		43.7405	67.2366	111.298	47.3588	30.7861	60.5621	79.9078	75.3623	16.592	41.0233	88.9218	43.408	21.1429	54.6939	130.204	53.7143	42.7495	42.1092	121.205	34.5763
		42.7001	63.5629	99.1172	56.7044	19.4331	53.1378	77.0949	33.4249	22.4085	27.0926	111.488	24.5288	26.2973	33.1346	97.756	31.9776	41.1953	40.555	75.2401	43.7567
		45.0112	69.0222	82.3395	84.5757	17.0389	40.6229	109.976	41.5557	15.7982	37.015	95.801	38.1098	29.1725	37.0266	110.87	34.467	33.191	39.2743	105.016	54.6425
		50.3831	56.0923	118.543	75.506	16.6503	52.4071	112.929	39.9233	18.5837	28.4229	92.7106	34.0493	34.6424	36.7111	91.3745	32.2931	30.2028	55.1761	119.744	39.7012

## Sheet: Figure 1b
Figure 1b		MCF7				LCC2				ZR75
		VC	UAG	E2	E2+UAG	VC	UAG	E2	E2+UAG	VC	UAG	E2	E2+UAG
Cell number count		0	100	0	100	0	100	0	100	0	100	0	100
Raw data		2238	2601	7831	3206	2198	2727	5034	2426	208	209	500	282
		2070	3752	9386	3108	2453	2116	4735	2803	218	242	452	293
		1881	3103	6129	2628	2338	1368	4447	2710	268	179	531	236
				7782				4738.67				494.333
		1044	1412	2167	1235	1118	1657	3638	2486	332	618	1107	639
		1230	1171	1649	1196	869	1541	3815	2913	169	618	1353	649
		846	1549	2046	1238	654	1617	4132	2796	235	536	1124	516
				1954				3861.67				1194.67
		MCF7				LCC2				ZR75
		VC	UAG	E2	E2+UAG	VC	UAG	E2	E2+UAG	VC	UAG	E2	E2+UAG
% E2		0	100	0	100	0	100	0	100	0	100	0	100
		28.7587	33.4233	100.63	41.1976	46.3844	57.5478	106.232	51.1958	42.0769	42.2792	101.146	57.0465
		26.5998	48.2138	120.612	39.9383	51.7656	44.6539	99.9226	59.1517	44.0998	48.9548	91.4363	59.2717
		24.1712	39.8741	78.7587	33.7702	49.3388	28.8689	93.845	57.1891	54.2144	36.2104	107.417	47.7411
		53.4254	72.2543	110.902	63.2216	28.9512	42.9089	94.208	64.3764	27.7902	51.7299	92.6618	53.4877
		62.957	59.9184	84.3937	61.2034	22.5032	39.9051	98.7915	75.4338	14.1462	51.7299	113.253	54.3248
		43.3118	79.2688	104.704	63.3652	16.9357	41.8731	107	72.404	19.6708	44.8661	94.0848	43.192
Validation
		28.7587	33.4233	100.63	41.1976	46.3844	57.5478	106.232	51.1958	42.0769	42.2792	101.146	57.0465
		26.5998	48.2138	120.612	39.9383	51.7656	44.6539	99.9226	59.1517	44.0998	48.9548	91.4363	59.2717
		24.1712	39.8741	78.7587	33.7702	49.3388	28.8689	93.845	57.1891	54.2144	36.2104	107.417	47.7411
		53.4289	72.262	110.901	63.2037	28.9512	42.9089	94.208	64.3763	27.7902	51.7299	92.6618	53.4877
		62.9478	59.9284	84.391	61.2078	22.5032	39.905	98.7915	75.4338	14.1462	51.7299	113.253	54.3248
		43.2958	79.2733	104.708	63.3572	16.9357	41.8731	107	72.404	19.6708	44.8661	94.0848	43.192

## Sheet: Figure 1c
Figure 1c		MDA-MB-468				DU4475				MDA-MB-157				HS578T				MDA-MB-231
		VC	UAG	CM	CM+UAG	VC	UAG	CM	CM+UAG	VC	UAG	CM	CM+UAG	VC	UAG	CM	CM+UAG	VC	UAG	CM	CM+UAG
Cell number count		0	100	0	100	0	100	0	100	0	100	0	100	0	100	0	100	0	100	0	100
Raw data		428	597	1575	627	164	229	575	513	233	745	1015	701	4434	5545	7226	8248	2237	3686	4534	3901
		438	599	1471	626	125	181	536	625	406	878	1062	659	5093	6196	6996	5782	1778	3112	4703	4295
		510	610	1151	694	132	215	489	621	280	788	895	725	5523	6882	8881	6826	1539	2964	4911	4486
				1399				533.333				990.667				7701				4716
		456	892	1490	1232	242	343	1319	1011	525	1614	2226	1429	553	2290	2928	2753	882	790	2071	1503
		658	859	1862	1250	182	208	1733	1791	654	1388	2120	1255	794	1610	2888	2684	530	368	1279	1226
		807	1777	2215	1050	153	294	1414	1238	973	1492	2517	1179	821	2290	2613	2340	494	503	2104	1406
				1855.67				1488.67				2287.67				2809.67				1818
		63	368	1204	456													408	489	1192	1386
		87	528	1517	522													655	643	1211	1308
		143	282	1420	503													438	677	1191	1128
				1380.33																1198
% CM		MDA-MB-468				DU4475				MDA-MB-157				HS578T				MDA-MB-231
		VC	UAG	CM	CM+UAG	VC	UAG	CM	CM+UAG	VC	UAG	CM	CM+UAG	VC	UAG	CM	CM+UAG	VC	UAG	CM	CM+UAG
		0	100	0	100	0	100	0	100	0	100	0	100	0	100	0	100	0	100	0	100
		30.5933	42.6733	112.58	44.8177	30.7502	42.9378	107.813	96.1881	23.5195	75.2019	102.456	70.7604	57.5769	72.0036	93.832	107.103	47.4343	78.1595	96.1408	82.7184
		31.3081	42.8163	105.147	44.7463	23.4377	33.9377	100.501	117.188	40.9825	88.6272	107.201	66.5209	66.1343	80.4571	90.8453	75.0812	37.7014	65.9881	99.7243	91.0729
		36.4546	43.6026	82.273	49.6069	24.7502	40.3128	91.6881	116.438	28.2638	79.5424	90.3432	73.183	71.718	89.365	115.323	88.6378	32.6336	62.8499	104.135	95.123
		24.5734	48.069	80.2946	66.3912	16.2562	23.0407	88.6028	67.9131	22.9491	70.5522	97.3044	62.4654	19.6821	81.5043	104.212	97.9831	48.5149	43.4543	113.916	82.6733
		35.459	46.2906	100.341	67.3612	12.2257	13.9722	116.413	120.309	28.5881	60.6732	92.6708	54.8594	28.2596	57.3022	102.788	95.5273	29.1529	20.242	70.352	67.4367
		43.4884	95.7607	119.364	56.5834	10.2776	19.7492	94.9843	83.1616	42.5324	65.2193	110.025	51.5372	29.2205	81.5043	93.0004	83.2839	27.1727	27.6678	115.732	77.3377
		4.56412	26.6602	87.2253	33.0355													34.0568	40.818	99.4992	115.693
		6.30283	38.2516	109.901	37.8169													54.6745	53.6728	101.085	109.182
		10.3598	20.4298	102.874	36.4405													36.5609	56.5109	99.4157	94.1569
Validation
		30.5933	42.6733	112.58	44.8177	30.75	42.9375	107.813	96.1875	23.5195	75.2019	102.456	70.7604	57.5769	72.0036	93.832	107.103	47.4343	78.1595	96.1408	82.7184
		31.3081	42.8163	105.147	44.7462	23.4375	33.9375	100.5	117.188	40.9825	88.6272	107.201	66.5209	66.1343	80.4571	90.8453	75.0812	37.7014	65.9881	99.7243	91.0729
		36.4546	43.6026	82.2731	49.6069	24.75	40.3125	91.6875	116.438	28.2638	79.5424	90.3432	73.183	71.718	89.365	115.323	88.6378	32.6336	62.8499	104.135	95.123
		24.5734	48.069	80.2946	66.3912	16.2562	23.0408	88.6028	67.9131	22.9491	70.5522	97.3044	62.4654	19.6821	81.5043	104.212	97.9832	48.5149	43.4543	113.916	82.6733
		35.459	46.2906	100.341	67.3612	12.2257	13.9722	116.413	120.309	28.5881	60.6732	92.6708	54.8594	28.2596	57.3022	102.788	95.5273	29.1529	20.242	70.352	67.4367
		43.4884	95.7607	119.364	56.5834	10.2777	19.7492	94.9843	83.1617	42.5324	65.2193	110.025	51.5372	29.2205	81.5043	93.0004	83.2839	27.1727	27.6678	115.732	77.3377
		33.0356	64.6222	107.945	89.254													34.0568	40.818	99.4992	115.693
		47.6698	62.2315	134.895	90.5581													54.6745	53.6728	101.085	109.182
		58.4643	128.737	160.469	76.0688													36.5609	56.5109	99.4157	94.1569

## Sheet: Figure 1d
Figure 1d
Cell number count
Raw data		MCF7 Neg						MCF7 transfected BRAF
		VC	UAG	E2	E2+UAG	CM	CM+UAG	VC	UAG	E2	E2+UAG	CM	CM+UAG
		0	100	0	100	0	100	0	100	0	100	0	100
	set 1	950	2357	2396	1258	2714	1212	1590	1668	2714	1904	5815	5538
		1046	1799	3115	1448	2661	1243	1379	1744	1627	2162	4901	4082
		708	1755	2314	1184	2750	1285	1369	2079	2675	1834	6631	3713
				2608.33		2708.33				2338.67		5782.33
	set 2	597	1804	4064	878	5503	1745	979	1615	2965	3692	7827	8073
		591	1533	3790	1097	5681	2560	1385	1599	3094	2554	7173	5512
		833	1980	3782	1379	4963	2470	772	1626	2758	2890	9404	8127
				3878.67		5382.33				2939		8134.67
		901.333						1446
	set 1 normalized	105.399	261.501	265.828	139.571	301.109	134.467	109.959	115.353	187.69	131.674	402.144	382.988
		116.05	199.593	345.599	160.651	295.229	137.907	95.3665	120.609	112.517	149.516	338.935	282.296
		78.5503	194.712	256.731	131.361	305.104	142.567	94.675	143.776	184.993	126.833	458.575	256.777
		673.667						1045.33
	set 2 normalized	88.6195	267.788	603.266	130.332	816.873	259.03	93.6543	154.496	283.642	353.189	748.756	772.29
		87.7289	227.561	562.593	162.84	843.295	380.01	132.494	152.966	295.982	244.324	686.193	527.296
		123.652	293.914	561.405	204.701	736.715	366.65	73.852	155.548	263.839	276.467	899.617	777.455

## Sheet: Figure 1e
Figure 1e		RKO				T29				A19
		VC	UAG	CM	CM+UAG	VC	UAG	CM	CM+UAG	VC	UAG	CM	CM+UAG
Cell number count		0	100	0	100	0	100	0	100	0	100	0	100
Raw data		65	430	1183	1532	109	173	740	435	88	151	382	597
		159	495	1233	1476	80	124	653	325	99	158	267	708
		235	523	1828	1510	151	100	737	339	77	69	544	350
				1414.67				710				397.667
		148	474	736	675	70	93	189	50	75	742	1286	1645
		386	763	1280	872	41	92	223	86	330	417	1155	1116
		470	418	1369	1011	72	67	86	48	645	394	1129	633
				1128.33				166				1190
% CM		RKO				T29				A19
		VC	UAG	CM	CM+UAG	VC	UAG	CM	CM+UAG	VC	UAG	CM	CM+UAG
		0	100	0	100	0	100	0	100	0	100	0	100
		4.59472	30.3959	83.6239	108.294	15.3521	24.3662	104.225	61.2676	22.1291	37.9715	96.0604	150.126
		11.2394	34.9906	87.1583	104.336	11.2676	17.4648	91.9718	45.7746	24.8952	39.7318	67.1417	178.039
		16.6117	36.9698	129.218	106.739	21.2676	14.0845	103.803	47.7465	19.363	17.3512	136.798	88.0134
		13.1167	42.0089	65.229	59.8227	42.1687	56.0241	113.855	30.1205	6.30252	62.3529	108.067	138.235
		34.2097	67.6219	113.442	77.2821	24.6988	55.4217	134.337	51.8072	27.7311	35.042	97.0588	93.7815
		41.6544	37.0458	121.329	89.6012	43.3735	40.3614	51.8072	28.9157	54.2017	33.1092	94.8739	53.1933
Validation
		4.59472	30.3959	83.6239	108.294	15.3521	24.3662	104.225	61.2676	22.1291	37.9715	96.0604	150.126
		11.2394	34.9906	87.1583	104.336	11.2676	17.4648	91.9718	45.7746	24.8952	39.7318	67.1417	178.039
		16.6117	36.9698	129.218	106.739	21.2676	14.0845	103.803	47.7465	19.363	17.3512	136.798	88.0134
		13.1167	42.0089	65.229	59.8228	42.1687	56.0241	113.855	30.1205	6.30252	62.3529	108.067	138.235
		34.2098	67.6219	113.442	77.2821	24.6988	55.4217	134.337	51.8072	27.7311	35.042	97.0588	93.7815
		41.6544	37.0458	121.329	89.6012	43.3735	40.3614	51.8072	28.9157	54.2017	33.1092	94.8739	53.1933

## Sheet: Figure 1f
Figure 1f		HCT116				H-WT				H-MUT
		VC	UAG	CM	CM+UAG	VC	UAG	CM	CM+UAG	VC	UAG	CM	CM+UAG
Cell number count		0	100	0	100	0	100	0	100	0	100	0	100
Raw data	set 1	356	501	1617	955	66	535	488	192	503	1056	1536	1707
		467	383	1220	850	78	81	632	273	812	707	1843	1895
		466	620	1525	1765	136	177	608	147	585	503	1733	1587
				1454				576				1704
	set 2	106	228	1691	885	123	94	1264	237	68	90	803	930
		201	260	1275	1363	101	203	640	275	90	127	891	801
		302	207	918	773	50	182	631	325	88	112	1057	894
				1294.67				845				917
		HCT116				H-WT				H-MUT
		VC	UAG	CM	CM+UAG	VC	UAG	CM	CM+UAG	VC	UAG	CM	CM+UAG
% CM		0	100	0	100	0	100	0	100	0	100	0	100
		24.4842	34.4567	111.21	65.6809	11.4583	92.8819	84.7222	33.3333	29.5188	61.9718	90.1408	100.176
		32.1183	26.3411	83.9065	58.4594	13.5417	14.0625	109.722	47.3958	47.6526	41.4906	108.157	111.209
		32.0495	42.641	104.883	121.389	23.6111	30.7292	105.556	25.5208	34.331	29.5188	101.702	93.1338
		8.18744	17.6107	130.613	68.3574	14.5562	11.1243	149.586	28.0473	7.41549	9.81461	87.5682	101.418
		15.5252	20.0824	98.4809	105.278	11.9527	24.0237	75.7396	32.5444	9.81461	13.8495	97.1647	87.3501
		23.3265	15.9887	70.9063	59.7065	5.91716	21.5385	74.6746	38.4615	9.59651	12.2137	115.267	97.4918
Validation
		24.4842	34.4567	111.21	65.6809	11.4583	92.8819	84.7222	33.3333	29.5188	61.9718	90.1408	100.176
		32.1183	26.3411	83.9065	58.4594	13.5417	14.0625	109.722	47.3958	47.6526	41.4906	108.157	111.209
		32.0495	42.641	104.883	121.389	23.6111	30.7292	105.556	25.5208	34.331	29.5188	101.702	93.1338
		8.18744	17.6107	130.613	68.3574	14.5562	11.1243	149.586	28.0473	7.41549	9.81461	87.5682	101.418
		15.5252	20.0824	98.4809	105.278	11.9527	24.0237	75.7396	32.5444	9.81461	13.8495	97.1647	87.3501
		23.3265	15.9887	70.9063	59.7065	5.91716	21.5385	74.6746	38.4615	9.59651	12.2137	115.267	97.4918
