# Supplementary material for: Three-dimensional growth of breast cancer cells potentiates the anti-tumor effects of unacylated ghrelin and AZP-531
Source: eLife. 2020 Jul 15;9:e56913. doi: 10.7554/eLife.56913 (PMC7363447; doi:10.7554/eLife.56913)
Supplement: Figure 2—figure supplement 1—source data 1. [file elife-56913-fig2-figsupp1-data1.xlsx]

## Sheet: Figure S2a
Raw data
		DAG			ATP			AG
	1e-12	0.017	0.025	0.006	0.029	0.047	0.035	0.032	0.009	0.017
	1e-11	0.023	0.032	0.016	0.041	0.068	0.032	0.029	0.046	0.024
	1e-10	0.031	-0.007	0.007	0.025	0.037	0.064	0.024	0.028	0.04
	1e-09	0.028	0.004	0.067	0.019	0.022	0.035	0.038	0.013	0.025
	1e-08	0.028	0.04	0.029	0.036	0.017	0.022	0.011	0.009	0.005
	1e-07	0	0.034	0.065	0.118	0.072	0.151	0.001	0.017	0.008
	1e-06	0.037	0.046	-0.006	0.363	0.492	0.583	0.051	0.045	0.058
	1e-05	0.039	0.02	0.029	0.793	0.842	0.796	0.026	0.017	0.016
	0.0001	0.012	0.044	0.059	0.732	0.898	0.726

## Sheet: Figure S2b
Raw data		GNAI1									GNAI2									GNAI3									Control
MDA-MB-468		GNAI1.1			GNAI1.2			GNAI1.3			GNAI2.1			GNAI2.2			GNAI2.3			GNAI3.1			GNAI3.2			GNAI3.3			scrambled
		0	0	100	0	0	100	0	0	100	0	0	100	0	0	100	0	0	100	0	0	100	0	0	100	0	0	100	0	0	100
		1017	3111	1754	1361	4081	2284	1370	3446	1985	579	2432	2674	1109	2715	3438	1621	5308	4976	1739	5309	2761	1475	4356	1818	2191	5859	3266	2667	13314	5554
		1148	3191	1897	1504	4050	2362	1358	3603	2119	889	2564	2611	999	2708	3114	1582	4169	4737	1792	5198	2798	1409	4690	1829	2000	6022	3479	2695	12990	5394
		1015	3129	1871	1554	3739	2286	1188	3587	1958	776	2423	2584	1010	2846	3029	1619	4411	4864	1788	5544	2711	1437	4650	1819	2073	5714	3252	2550	9334	5469
			3143.67			3956.67			3545.33			2473			2756.33			4629.33			5350.33			4565.33			5865			11879.3
		GNAI1									GNAI2									GNAI3									Control
in %		GNAI1.1			GNAI1.2			GNAI1.3			GNAI2.1			GNAI2.2			GNAI2.3			GNAI3.1			GNAI3.2			GNAI3.3			scrambled
		0	0	100	0	0	100	0	0	100	0	0	100	0	0	100	0	0	100	0	0	100	0	0	100	0	0	100	0	0	100
		32.3508	98.9609	55.7947	34.3976	103.142	57.7254	38.6423	97.1982	55.9891	23.4129	98.3421	108.128	40.2346	98.5004	124.731	35.0158	114.66	107.488	32.5027	99.2275	51.6043	32.3087	95.4147	39.8218	37.3572	99.8977	55.6863	22.4508	112.077	46.7535
		36.5179	101.506	60.3435	38.0118	102.359	59.6967	38.3039	101.627	59.7687	35.9482	103.68	105.58	36.2438	98.2465	112.976	34.1734	90.0562	102.326	33.4932	97.1528	52.2958	30.863	102.731	40.0628	34.1006	102.677	59.318	22.6865	109.35	45.4066
		32.2871	99.5335	59.5165	39.2755	94.4987	57.7759	33.5088	101.175	55.2275	31.3789	97.9782	104.488	36.6429	103.253	109.892	34.9726	95.2837	105.069	33.4185	103.62	50.6697	31.4764	101.855	39.8438	35.3453	97.4254	55.4476	21.4659	78.5734	46.0379
Validation
		32.3508	98.9609	55.7947	34.3976	103.142	57.7254	38.6423	97.1982	55.9891	23.4129	98.3421	108.128	40.2346	98.5004	124.731	35.0158	114.66	107.488	32.5026	99.2275	51.6043	32.3087	95.4147	39.8218	37.3572	99.8977	55.6863	22.4508	112.077	46.7535
		36.5179	101.506	60.3435	38.0118	102.359	59.6967	38.3039	101.627	59.7687	35.9482	103.68	105.58	36.2438	98.2465	112.976	34.1734	90.0562	102.326	33.4932	97.1528	52.2958	30.863	102.731	40.0628	34.1006	102.677	59.318	22.6865	109.35	45.4066
		32.2871	99.5335	59.5165	39.2755	94.4987	57.7759	33.5088	101.175	55.2275	31.3789	97.9782	104.488	36.6429	103.253	109.892	34.9726	95.2837	105.069	33.4185	103.62	50.6697	31.4763	101.855	39.8438	35.3453	97.4254	55.4476	21.4659	78.5734	46.0379

## Sheet: Figure S2c
Raw data
ZR75
		VC	E2	E2+UAG	E2+UAG+PT20	E2+UAG+PT200
		0	0	100	100	100
		1588	4617	1458	6987	5407
		1744	5225	2147	6672	6117
		2499	5567	2720	7708	6193

## Sheet: Figures S2d
Raw data
MDA-MB 468		VC	UAG	CM	CM+UAG	CM+KT	CM+SQ	CM+cAMP-RP
		0	100	0	100	0	0	0
		202	668	1499	480	278	335	309
		413	690	1199	310	272	318	290
		345	696	1300	466	267	384	339
				1332.67
	in %	VC	UAG	CM	CM+UAG	CM+KT	CM+SQ	CM+cAMP-RP
		0	100	0	100	0	0	0
		15.1576	50.1251	112.481	36.018	20.8604	25.1376	23.1866
		30.9905	51.7759	89.97	23.2616	20.4102	23.8619	21.7609
		25.8879	52.2261	97.5488	34.9675	20.035	28.8144	25.4377
Validation
		15.1576	50.1251	112.481	36.018	20.8604	25.1376	23.1866
		30.9905	51.7759	89.97	23.2616	20.4102	23.8619	21.7609
		25.8879	52.2261	97.5488	34.9675	20.035	28.8144	25.4377

## Sheet: Figure S2e
Raw data
ZR75		VC	UAG	FSK	FSK+UAG
		0	100	0	100
		245	598	728	563
		316	641	805	460
		381	509	710	564
				747.667
		VC	UAG	FSK	FSK+UAG
in %		0	100	0	100
		32.7686	79.9822	97.3696	75.3009
		42.2648	85.7334	107.668	61.5247
		50.9585	68.0785	94.9621	75.4347
Validation
		32.7686	79.9822	97.3696	75.3009
		42.2648	85.7334	107.668	61.5247
		50.9585	68.0785	94.9621	75.4347
