# Supplementary material for: Three-dimensional growth of breast cancer cells potentiates the anti-tumor effects of unacylated ghrelin and AZP-531
Source: eLife. 2020 Jul 15;9:e56913. doi: 10.7554/eLife.56913 (PMC7363447; doi:10.7554/eLife.56913)
Supplement: Figure 2—source data 1. [file elife-56913-fig2-data1.xlsx]

## Sheet: Figure 2a
cAMP assay											STD (M)												STD (M)
										STD1	1e-06	306	322	308								STD1	1e-06	306	322	308
										STD2	3e-07	327	341	310								STD2	3e-07	327	341	310
										STD3	1e-07	316	374	12703								STD3	1e-07	316	374
										STD4	3e-08	378	341	337								STD4	3e-08	378	341	337
										STD5	1e-08	439	398	12053								STD5	1e-08	439	398
										STD6	3e-09	631	700	702								STD6	3e-09	631	700	702
										STD7	1e-09	1452	1424	8953								STD7	1e-09	1452	1424
										STD8	3e-10	3942	4733	5216								STD8	3e-10	3942	4733	5216
										STD9	1e-10	6496	6364	10756								STD9	1e-10	6496	6364
										STD10	3e-11	6370	6683	7130								STD10	3e-11	6370	6683	7130
										STD11	1e-11	6855	6331	5789								STD11	1e-11	6855	6331	5789
										STD12	0	13607	5790	140								STD12	0	13607	5790
										VC		5074	5783	6202	6173							VC		5074	5783	6202	6173
										FSK 1uM		1619	1729	1756	2162							FSK 1uM		1619	1729	1756	2162
										FSK + 1nM DAG		1107	4052	2944	4047							FSK + 1nM DAG		1107	4052	2944	4047
										FSK + 100pM DAG		3140	3868	1444	2912							FSK + 100pM DAG		3140	3868	1444	2912
										FSK + 10pM DAG		3168	1084	1398	3027							FSK + 10pM DAG		3168	1084	1398	3027
										FSK + 1pM DAG		2826	4572	893	3250							FSK + Melatonin		2861	1128	3047	3101
										FSK + 0.1pM DAG		5877	3042	967	1623
										FSK + Melatonin		2861	1128	3047	3101
										Interpolated X replicates	STD (M) (Interpolated)	Data Set-A (Entered)							Interpolated X replicates	STD (M) (Interpolated)	Data Set-A (Entered)
										VC	-9.59582	5074							VC	-9.59582	5074
										VC	-9.76742	5783							VC	-9.76742	5783
	VC	0.5mM FSK	FSK+UAG 10	FSK+UAG 100	FSK+UAG 1000	FSK+Mel				VC	-9.94871	6202							VC	-9.94871	6202
	0	0	10	100	1000	0				VC	-9.93127	6173							VC	-9.93127	6173
	2.53617e-10	9.14136e-10	5.00846e-10	5.05517e-10	3.7389e-10	5.55201e-10				FSK 1uM	-9.03899	1619							FSK 1uM	-9.03899	1619
	1.70837e-10	8.65651e-10		3.97741e-10	5.39773e-10					FSK 1uM	-9.06266	1729							FSK 1uM	-9.06266	1729
	1.12537e-10	8.54572e-10			3.74526e-10	5.21415e-10				FSK 1uM	-9.06825	1756							FSK 1uM	-9.06825	1756
	1.17147e-10	7.16811e-10	5.24915e-10	5.45652e-10		5.12109e-10				FSK 1uM	-9.1446	2162							FSK 1uM	-9.1446	2162
										FSK + 1nM DAG	-8.90015	1107							FSK + 1nM DAG	-8.90015	1107
										FSK + 1nM DAG	-9.42726	4052							FSK + 1nM DAG	-9.42726	4052
										FSK + 1nM DAG	-9.26779	2944							FSK + 1nM DAG	-9.26779	2944
										FSK + 1nM DAG	-9.42652	4047							FSK + 1nM DAG	-9.42652	4047
										FSK + 100pM DAG	-9.29627	3140							FSK + 100pM DAG	-9.29627	3140
										FSK + 100pM DAG	-9.4004	3868							FSK + 100pM DAG	-9.4004	3868
										FSK + 100pM DAG	-8.99784	1444							FSK + 100pM DAG	-8.99784	1444
										FSK + 100pM DAG	-9.26308	2912							FSK + 100pM DAG	-9.26308	2912
										FSK + 10pM DAG	-9.3003	3168							FSK + 10pM DAG	-9.3003	3168
										FSK + 10pM DAG	-8.89217	1084							FSK + 10pM DAG	-8.89217	1084
										FSK + 10pM DAG	-8.98616	1398							FSK + 10pM DAG	-8.98616	1398
										FSK + 10pM DAG	-9.27991	3027							FSK + 10pM DAG	-9.27991	3027
										FSK + 1pM DAG	-9.25035	2826							FSK + Melatonin	-9.25555	2861
										FSK + 1pM DAG	-9.50733	4572							FSK + Melatonin	-8.90725	1128
										FSK + 1pM DAG	-8.81527	893							FSK + Melatonin	-9.28282	3047
										FSK + 1pM DAG	-9.31206	3250							FSK + Melatonin	-9.29064	3101
										FSK + 0.1pM DAG	-9.79895	5877
										FSK + 0.1pM DAG	-9.28209	3042
										FSK + 0.1pM DAG	-8.84767	967
										FSK + 0.1pM DAG	-9.03988	1623
										FSK + Melatonin	-9.25555	2861
										FSK + Melatonin	-8.90725	1128
										FSK + Melatonin	-9.28282	3047
										FSK + Melatonin	-9.29064	3101
																			Transform X value to 10^X	STD (M) (Interpolated)	Data Set-A (Entered)
										Transform X value to 10^X	STD (M) (Interpolated)	Data Set-A (Entered)							VC	2.53617e-10	5074
										VC	2.53617e-10	5074							VC	1.70837e-10	5783
										VC	1.70837e-10	5783							VC	1.12537e-10	6202
										VC	1.12537e-10	6202							VC	1.17147e-10	6173
										VC	1.17147e-10	6173							FSK 1uM	9.14136e-10	1619
										FSK 1uM	9.14136e-10	1619							FSK 1uM	8.65651e-10	1729
										FSK 1uM	8.65651e-10	1729							FSK 1uM	8.54572e-10	1756
										FSK 1uM	8.54572e-10	1756							FSK 1uM	7.16811e-10	2162
										FSK 1uM	7.16811e-10	2162							FSK + 1nM DAG	1.2585e-09	1107
										FSK + 1nM DAG	1.2585e-09	1107							FSK + 1nM DAG	3.7389e-10	4052
										FSK + 1nM DAG	3.7389e-10	4052							FSK + 1nM DAG	5.39773e-10	2944
										FSK + 1nM DAG	5.39773e-10	2944							FSK + 1nM DAG	3.74526e-10	4047
										FSK + 1nM DAG	3.74526e-10	4047							FSK + 100pM DAG	5.05517e-10	3140
										FSK + 100pM DAG	5.05517e-10	3140							FSK + 100pM DAG	3.97741e-10	3868
										FSK + 100pM DAG	3.97741e-10	3868							FSK + 100pM DAG	1.00498e-09	1444
										FSK + 100pM DAG	1.00498e-09	1444							FSK + 100pM DAG	5.45652e-10	2912
										FSK + 100pM DAG	5.45652e-10	2912							FSK + 10pM DAG	5.00846e-10	3168
										FSK + 10pM DAG	5.00846e-10	3168							FSK + 10pM DAG	1.28184e-09	1084
										FSK + 10pM DAG	1.28184e-09	1084							FSK + 10pM DAG	1.03239e-09	1398
										FSK + 10pM DAG	1.03239e-09	1398							FSK + 10pM DAG	5.24915e-10	3027
										FSK + 10pM DAG	5.24915e-10	3027							FSK + Melatonin	5.55201e-10	2861
										FSK + 1pM DAG	5.61888e-10	2826							FSK + Melatonin	1.2381e-09	1128
										FSK + 1pM DAG	3.10935e-10	4572							FSK + Melatonin	5.21415e-10	3047
										FSK + 1pM DAG	1.53013e-09	893							FSK + Melatonin	5.12109e-10	3101
										FSK + 1pM DAG	4.87462e-10	3250
										FSK + 0.1pM DAG	1.58874e-10	5877
										FSK + 0.1pM DAG	5.22286e-10	3042
										FSK + 0.1pM DAG	1.42014e-09	967
										FSK + 0.1pM DAG	9.12271e-10	1623
										FSK + Melatonin	5.55201e-10	2861
										FSK + Melatonin	1.2381e-09	1128
										FSK + Melatonin	5.21415e-10	3047
										FSK + Melatonin	5.12109e-10	3101

## Sheet: Figure 2c
Figure 2c		GNAI1									GNAI2									GNAI3									Control
		GNAI1.1			GNAI1.2			GNAI1.3			GNAI2.1			GNAI2.2			GNAI2.3			GNAI3.1			GNAI3.2			GNAI3.3			scrambled
Cell number count		0	0	100	0	0	100	0	0	100	0	0	100	0	0	100	0	0	100	0	0	100	0	0	100	0	0	100	0	0	100
Raw data		1129	2081	2072	1057	2887	1183	1806	2640	1701	1984	3202	3201	2377	4203	3716	1604	2649	2584	2197	3990	2253	870	2049	1089	661	1308	983	873	2308	1198
		1246	2863	1572	1023	2412	1436	1877	2703	2011	1966	3098	3241	2370	3629	3737	1466	2820	2510	2144	3968	2418	947	2721	1093	448	1210	883	885	2461	1143
		1423	2330	2063	1048	2377	1701	1877	2801	1659	1966	3170	2943	2395	3660	3685	1494	2851	2418	2030	4095	2399	748	2327	986	502	1476	885	674	2475	1098
			2424.67			2558.67			2714.67			3156.67			3830.67			2773.33			4017.67			2365.67			1331.33			2414.67
		GNAI1									GNAI2									GNAI3									Control
		GNAI1.1			GNAI1.2			GNAI1.3			GNAI2.1			GNAI2.2			GNAI2.3			GNAI3.1			GNAI3.2			GNAI3.3			scrambled
%CM		0	0	100	0	0	100	0	0	100	0	0	100	0	0	100	0	0	100	0	0	100	0	0	100	0	0	100	0	0	100
		46.5631	85.8262	85.455	41.3106	112.832	46.235	66.5275	97.2495	62.6596	62.8511	101.436	101.404	62.0519	109.72	97.0066	57.8365	95.5168	93.1731	54.6835	99.3114	56.0773	36.7761	86.6141	46.0335	49.6495	98.2474	73.8358	36.1541	95.5826	49.6135
		51.3885	118.078	64.8337	39.9818	94.2678	56.123	69.1429	99.5702	74.0791	62.2809	98.1415	102.672	61.8691	94.7355	97.5548	52.8606	101.683	90.5048	53.3643	98.7638	60.1842	40.031	115.02	46.2026	33.6505	90.8863	66.3245	36.651	101.919	47.3357
		58.6885	96.0957	85.0839	40.9588	92.8999	66.4799	69.1429	103.18	61.1125	62.2809	100.422	93.2313	62.5218	95.5447	96.1974	53.8702	102.8	87.1875	50.5268	101.925	59.7113	31.619	98.3655	41.6796	37.7066	110.866	66.4747	27.9128	102.499	45.4721
Validation
		46.5631	85.8262	85.455	41.3106	112.832	46.235	66.5275	97.2495	62.6596	62.8511	101.436	101.404	62.0519	109.72	97.0066	57.8365	95.5168	93.1731	54.6835	99.3114	56.0773	36.7761	86.6141	46.0335	49.6495	98.2474	73.8358	36.1541	95.5825	49.6135
		51.3885	118.078	64.8336	39.9818	94.2678	56.123	69.1429	99.5702	74.0791	62.2809	98.1415	102.672	61.8691	94.7355	97.5548	52.8606	101.683	90.5048	53.3643	98.7638	60.1842	40.031	115.02	46.2026	33.6505	90.8864	66.3245	36.651	101.919	47.3357
		58.6885	96.0957	85.0838	40.9588	92.8999	66.4799	69.1429	103.18	61.1125	62.2809	100.422	93.2312	62.5217	95.5447	96.1973	53.8702	102.8	87.1875	50.5268	101.925	59.7113	31.619	98.3655	41.6796	37.7066	110.866	66.4747	27.9128	102.499	45.4721

## Sheet: Figure 2d
Figure 2d
Cell number count
Raw data		VC	E2	E2+UAG	E2+PT 20	E2+PT200
		0	0	100	100	100
		779	4605	1644	2892	4908
		511	4626	1493	2635	5936
		1238	2856	611	2697	6878

## Sheet: Figure 2e (MCF7)
Figure 2e
Cell number count
Raw data		VC	CM	CM+UAG	CM+PT 20	CM+PT200
		0	0	100	100	100
		1906	3603	2604	4969	4726
		1889	4205	2446	3579	3866
		1353	4682	2061	3384	4021

## Sheet: Figure 2e (MDA-MB 468)
Figure 2e
Cell number count
Raw data		VC	CM	CM+UAG	CM+PT 20	CM+PT200
		4000	12330	5332	6836	7871
		3473	11273	5246	6202	8952
		2482	10694	5394	6534	9001

## Sheet: Figure 2f
Figure 2f
Cell number count
Raw data		VC	UAG	CM	CM+UAG	CM+KT	CM+SQ	CM+cAMP-RP
		4477	8671	14438	7470	8651	4870	11011
		4573	8479	14655	7919	9632	8853	11488
		7119	9063	15568	7518	12166	5357	9168
				14887
		VC	UAG	CM	CM+UAG	CM+KT	CM+SQ	CM+cAMP-RP
%CM		0	100	0	100	0	0	0
		30.0732	58.2454	96.9839	50.178	58.1111	32.7131	73.9639
		30.7181	56.9557	98.4416	53.1941	64.7007	59.468	77.168
		47.8203	60.8786	104.575	50.5004	81.7223	35.9844	61.5839
Validation
		30.0732	58.2454	96.9839	50.178	58.1111	32.7131	73.9639
		30.7181	56.9557	98.4416	53.1941	64.7007	59.468	77.168
		47.8202	60.8786	104.574	50.5004	81.7223	35.9844	61.5839

## Sheet: Figure 2g
Figure 2g
Cell number count
Raw data		MCF7				MDA-MB-468				MDA-MB-231
		VC	UAG	FSK	FSK+UAG	VC	UAG	FSK	FSK+UAG	VC	UAG	FSK	FSK+UAG
		0	100	0	100	0	100	0	100	0	100	0	100
		2238	2601	5408	2810	670	1060	1525	1154	2803	4598	3270	3916
		2070	3752	8646	3501	783	1240	1785	858	3232	4171	4822	4501
		1881	3103	6620	2871	731	1158	1297	723	3149	3951	4630	5076
				6891.33				1535.67				4240.67
		MCF7				MDA-MB-468				MDA-MB-231
		VC	UAG	FSK	FSK+UAG	VC	UAG	FSK	FSK+UAG	VC	UAG	FSK	FSK+UAG
%FSK		0	100	0	100	0	100	0	100	0	100	0	100
		32.4756	37.7431	78.4754	40.7759	43.6293	69.0254	99.3054	75.1465	66.0981	108.426	77.1105	92.344
		30.0377	54.4452	125.462	50.8029	50.9876	80.7467	116.236	55.8715	76.2144	98.3572	113.709	106.139
		27.2952	45.0276	96.0627	41.661	47.6015	75.407	84.4584	47.0805	74.2572	93.1693	109.181	119.698
Validation
		32.4756	37.7431	78.4754	40.7759	43.6293	69.0254	99.3054	75.1465	66.0981	108.426	77.1105	92.344
		30.0377	54.4452	125.462	50.8029	50.9876	80.7467	116.236	55.8715	76.2144	98.3572	113.709	106.139
		27.2952	45.0276	96.0627	41.661	47.6015	75.407	84.4584	47.0805	74.2572	93.1693	109.181	119.698

## Sheet: Figure 2h
Figure 2h		MCF7			MDA-MB-468			MDA-MB-231					Original experiment data set and Validation
		VC	FSK	FSK+U0126	VC	FSK	FSK+U0126	VC	FSK	FSK+U0126			MDA-MB231
Cell number count		305	1662	261	687	5885	624	162	417	326			VC	MAPKi	FSK	FSK+MAPKi
Raw data		624	1582	739	518	5613	666	89	316	200			162	228	417	326
		521	1653	867	521	4357	640	70	528	245			89	203	316	200
			1632.33			5285			420.333				70	303	528	245
															420.333
													38.5408	54.2427	99.207	77.5575
		MCF7			MDA-MB-468			MDA-MB-231					21.1737	48.295	75.1784	47.5813
		VC	FSK	FSK+U0126	VC	FSK	FSK+U0126	VC	FSK	FSK+U0126			16.6534	72.0856	125.615	58.2871
%CM		0	0	100	0	0	100	0	0	100
		18.6887	101.838	15.9926	12.9991	111.353	11.807	38.5411	99.2078	77.5581			MDA-MB468
		38.2353	96.9363	45.2819	9.80132	106.206	12.6017	21.1738	75.179	47.5817			VC	MAPKi	FSK	FSK+MAPKi
		31.924	101.287	53.125	9.85809	82.4409	12.1097	16.6536	125.616	58.2875			687	802	5885	624
													518	902	5613	666
													521	585	4357	640
															5285
													12.9991	15.175	111.353	11.807
													9.80132	17.0672	106.206	12.6017
													9.85809	11.0691	82.4409	12.1097
													MCF7
													VC	MAPKi	FSK	FSK+MAPKi
													305	604	1662	261
													624	556	1582	739
													521	778	1653	867
															1632.33
													18.6887	37.0098	101.838	15.9926
													38.2353	34.0686	96.9363	45.2819
													31.924	47.6716	101.287	53.125
