# Supplementary material for: Three-dimensional growth of breast cancer cells potentiates the anti-tumor effects of unacylated ghrelin and AZP-531
Source: eLife. 2020 Jul 15;9:e56913. doi: 10.7554/eLife.56913 (PMC7363447; doi:10.7554/eLife.56913)
Supplement: Figure 3—source data 1. [file elife-56913-fig3-data1.xlsx]

## Sheet: Figure 3a
Figure 3a
Raw data	Time	FBS										FBS+100pM UAG										FBS+MEKi
	0	0.740753	0.835081	0.581483	0.735279	0.96676	0.998587	0.869963	0.783631	0.777758	0.905366	1.37736	1.16925	1.07433	1.25726	1.12204	1.06622	1.31742	1.06695	1.03947	1.0749	1.57966	1.59701	1.45735	1.5546	1.83929	1.62658	1.79114	1.77239	1.78307	1.75138
	0.75	0.735915	0.818192	0.599573	0.739404	0.973962	1.01869	0.847114	0.822635	0.780519	0.954787	1.31527	1.15285	1.0885	1.21326	1.10649	1.0214	1.28939	1.05324	1.05984	1.08141	1.45729	1.52447	1.36706	1.48693	1.54955	1.63824	1.79448	1.77733	1.81211	1.74087
	1.5	0.723067	0.869045	0.597099	0.739604	0.97387	1.00027	0.830211	0.819837	0.790929	0.999552	1.32228	1.16348	1.11695	1.17801	1.1137	1.0105	1.40727	1.12668	1.0328	1.06954	1.46399	1.51541	1.38733	1.46895	1.84007	1.65361	1.8044	1.80359	1.82014	1.7012
	2.25	0.726326	0.828609	0.576277	0.748851	1.02584	0.980385	0.852817	0.856676	0.78587	1.0375	1.36712	1.11125	1.06087	1.15474	1.06908	1.05164	1.45421	1.04987	1.05501	1.06315	1.54354	1.5351	1.39718	1.45594	1.59816	1.63972	1.81725	1.7848	1.76418	1.59298
	3	0.707322	0.852194	0.580784	0.774397	0.962996	0.980492	0.868637	0.846821	0.815752	0.89273	1.31443	0.967188	1.04849	1.16877	1.14859	0.965923	1.3178	1.03836	1.00733	1.06722	1.50718	1.6619	1.41759	1.43864	1.67571	1.61821	1.75398	1.71883	1.72815	1.54876
	3.75	0.723841	0.83417	0.59481	0.756869	0.952988	0.963282	0.891774	0.866471	0.807938	0.842065	1.32766	0.951417	1.04498	1.14202	1.13893	0.990618	1.36435	0.99661	1.03162	1.07216	1.40698	1.6581	1.39898	1.44808	1.55606	1.61953	1.77334	1.74477	1.59552	1.59646
	4.5	0.694755	0.840417	0.612722	0.754397	0.960104	0.947211	0.906123	0.871532	0.824582	0.764458	1.25469	0.945606	1.0339	1.29065	1.13889	0.976334	1.33573	1.05366	1.01254	1.03976	1.59199	1.61125	1.45318	1.40258	1.56193	1.56549	1.70603	1.6869	1.7424	1.58516
	5.25	0.686884	0.805995	0.659779	0.773434	0.966951	0.996654	0.898438	0.896106	0.826605	0.7794	1.2295	0.947214	1.0268	1.17924	1.05729	0.961213	1.39226	0.997622	0.990675	1.03423	1.44104	1.69314	1.44239	1.3743	1.46696	1.57444	1.67905	1.72239	1.8129	1.86295
	6	0.70825	0.870514	0.611967	0.827144	0.926523	0.989585	0.92337	0.903224	0.809276	0.820992	1.23511	0.938998	1.01804	1.19245	1.17134	0.946091	1.27292	1.0047	0.972151	1.05989	1.39737	1.54891	1.41992	1.4484	1.47302	1.57085	1.70819	1.70133	1.71021	1.55743
	6.75	0.694221	0.839291	0.632037	0.841754	0.955637	1.01191	0.919912	0.851304	0.810864	0.926752	1.23969	0.923691	1.01551	1.13822	1.01456	0.920055	1.28058	1.07522	0.935309	1.09184	1.37828	1.59552	1.52529	1.32705	1.53073	1.53105	1.77453	1.73351	1.70213	1.594
	7.5	0.713456	0.843425	0.635549	0.866015	0.928458	0.9813	0.945394	0.890407	0.81586	0.871193	1.26492	0.915293	0.999844	1.13936	1.05508	0.957781	1.2773	0.950778	0.943252	1.05113	1.37917	1.51087	1.51034	1.39522	1.53523	1.53385	1.72366	1.71861	1.70746	1.5627
	8.25	0.713946	0.786598	0.718058	0.854145	0.934176	0.962041	0.971662	0.912413	0.824159	0.875138	1.23336	0.892305	1.00043	1.17364	1.0435	0.925779	1.25536	0.952439	0.947536	1.03651	1.48478	1.70937	1.47906	1.40963	1.55985	1.51435	1.73221	1.70974	1.64326	1.80882
	9	0.691115	0.798707	0.711622	0.864482	0.910756	1.03534	0.986444	0.890902	0.848304	0.863571	1.22643	0.88173	0.989451	1.09634	1.01759	0.884692	1.28001	0.920046	0.918387	1.06866	1.42873	1.53872	1.46548	1.38338	1.51427	1.52443	1.71557	1.717	1.73857	1.67929
	9.75	0.701565	0.81197	0.671518	0.847638	0.927488	1.01204	0.974877	0.898071	0.847957	0.896067	1.29924	0.872468	0.979875	1.16546	1.01248	0.855372	1.32629	1.06365	0.904464	1.05179	1.39534	1.50632	1.4898	1.44501	1.52809	1.51653	1.72065	1.7065	1.73694	1.50815
	10.5	0.690533	0.713358	0.710433	0.855761	0.961272	0.979735	1.03351	0.908705	0.86111	0.902574	1.2441	0.864893	0.976368	1.08688	1.0047	0.864707	1.25012	0.930069	0.896596	1.04342	1.40062	1.53585	1.51215	1.37997	1.54418	1.49098	1.70319	1.69785	1.61383	1.60046
	11.25	0.780141	0.802443	0.762643	0.87301	0.919945	0.980692	1.00961	0.914951	0.863655	0.916171	1.21352	0.804431	0.972073	1.12489	1.00009	0.878118	1.23091	0.926191	0.928848	1.033	1.44435	1.47828	1.4646	1.34448	1.50441	1.55494	1.71682	1.67464	1.63091	1.52977
% time 0	Time	FBS										FBS+100pM UAG										FBS+MEKi
	0	100	100	100	100	100	100	100	100	100	100	100	100	100	100	100	100	100	100	100	100	100	100	100	100	100	100	100	100	100	100
	0.75	99.3469	97.9776	103.111	100.561	100.745	102.014	97.3736	104.977	100.355	105.459	95.4922	98.5977	101.32	96.5005	98.614	95.7967	97.8726	98.715	101.959	100.605	92.2536	95.4575	93.8042	95.6469	84.2469	100.716	100.186	100.279	101.629	99.3999
	1.5	97.6124	104.067	102.686	100.588	100.735	100.168	95.4306	104.62	101.693	110.403	96.0011	99.5063	103.968	93.6971	99.2567	94.7741	106.82	105.598	99.3583	99.5012	92.6779	94.8906	95.1951	94.4906	100.042	101.662	100.741	101.76	102.079	97.1351
	2.25	98.0524	99.225	99.1047	101.846	106.111	98.1773	98.0292	109.321	101.043	114.595	99.257	95.0393	98.7475	91.8462	95.28	98.6331	110.383	98.3991	101.495	98.907	97.7137	96.1232	95.871	93.6534	86.8897	100.807	101.458	100.7	98.9406	90.9556
	3	95.4869	102.049	99.8799	105.32	99.6107	98.188	99.8476	108.064	104.885	98.6044	95.4313	82.7187	97.5951	92.9617	102.366	90.5934	100.029	97.32	96.9081	99.2857	95.4118	104.063	97.272	92.5408	91.1061	99.4855	97.9252	96.9779	96.9199	88.4311
	3.75	97.7169	99.891	102.292	102.936	98.5754	96.4645	102.507	110.571	103.88	93.0082	96.3916	81.3698	97.2682	90.8343	101.505	92.9096	103.563	93.407	99.2448	99.7449	89.0686	103.826	95.9946	93.1479	84.601	99.566	99.0061	98.4414	89.4818	91.1548
	4.5	93.7903	100.639	105.372	102.6	99.3115	94.8552	104.157	111.217	106.02	84.4364	91.0942	80.8729	96.2372	102.656	101.501	91.5699	101.39	98.7536	97.4094	96.7306	100.781	100.892	99.7138	90.2212	84.9203	96.244	95.2486	95.1763	97.7194	90.5092
	5.25	92.7278	96.517	113.465	105.189	100.02	99.8065	103.273	114.353	106.281	86.0867	89.2648	81.0104	95.5761	93.7943	94.2292	90.1517	105.681	93.5018	95.3058	96.216	91.2248	106.019	98.9737	88.4021	79.7568	96.7942	93.7422	97.1788	101.673	106.37
	6	95.6122	104.243	105.242	112.494	95.838	99.0985	106.139	115.261	104.052	90.6807	89.6724	80.3077	94.7603	94.8452	104.393	88.7334	96.6224	94.1653	93.5237	98.6039	88.4606	96.9878	97.4315	93.1685	80.086	96.5734	95.3691	95.9903	95.9138	88.9261
	6.75	93.7183	100.504	108.694	114.481	98.8495	101.334	105.742	108.636	104.257	102.362	90.0051	78.9986	94.5252	90.5316	90.4202	86.2915	97.2039	100.775	89.9795	101.576	87.252	99.9068	104.662	85.3628	83.2239	94.127	99.0728	97.806	95.4609	91.0143
	7.5	96.3149	100.999	109.298	117.78	96.0381	98.2689	108.671	113.626	104.899	96.2256	91.8366	78.2804	93.067	90.6227	94.0322	89.8298	96.9551	89.1114	90.7436	97.7883	87.3082	94.6059	103.636	89.7476	83.4687	94.2991	96.2324	96.9657	95.7597	89.2269
	8.25	96.3811	94.1942	123.487	116.166	96.6296	96.3403	111.69	116.434	105.966	96.6613	89.5457	76.3143	93.1219	93.3491	92.9996	86.8284	95.2896	89.267	91.1557	96.4282	93.9942	107.035	101.49	90.6744	84.8071	93.1	96.7098	96.4653	92.1593	103.28
	9	93.299	95.6443	122.381	117.572	94.207	103.68	113.389	113.689	109.07	95.3837	89.042	75.4099	92.0996	87.201	90.6907	82.9748	97.1604	86.231	88.3515	99.4197	90.446	96.3501	100.558	88.9863	82.329	93.7199	95.7807	96.8744	97.5044	95.8838
	9.75	94.7097	97.2325	115.484	115.281	95.9378	101.347	112.06	114.604	109.026	98.9729	94.3281	74.6177	91.2083	92.6984	90.2352	80.2249	100.674	99.6899	87.0121	97.8496	88.3317	94.3214	102.227	92.9507	83.0802	93.2339	96.0647	96.2824	97.4131	86.112
	10.5	93.2204	85.4239	122.176	116.386	99.4324	98.1121	118.799	115.961	110.717	99.6916	90.3251	73.9699	90.8818	86.4486	89.5417	81.1004	94.892	87.1704	86.2552	97.0715	88.6661	96.1703	103.76	88.7667	83.955	91.663	95.0898	95.7942	90.5085	91.3828
	11.25	105.317	96.0917	131.155	118.732	95.1575	98.208	116.052	116.758	111.044	101.194	88.1047	68.7989	90.482	89.4715	89.1313	82.3583	93.4336	86.807	89.3579	96.1017	91.4343	92.5654	100.498	86.4843	81.7929	95.5956	95.8505	94.4847	91.4663	87.3465

## Sheet: Figure 3e
Figure 3e
			10% FBS					FBS + UAG					FBS + PIK3i
Raw data			100	100	100	100	100	100	100	100	100	100	100	100	100	100	100
			101.96	66.17	43.8	50.04	41.96	150.61	134.02	56.74	43.12	32.16	229.68	106.25	30.059	229.68	229.68
			6.99	5.58	5.51			52.13	10.33	7.53	6.2	6.25	152.48	15.17	6.45197	152.48	152.48
			8.64	6	6.48	6.21	5.51	134.88	44.98	7.23	5.69	6.04	75.86	179.69	5.63202	75.86	75.86
			7.7	10.34	5.65	5.51	5.64	133.04	70.73	9.32	5.71	7	57	37.04	5.56006	57	57
			27.62	9.38	5.54	5.54	6.48	138.06	28.35	7.18	6.34	5.54	37.38	74.21	4.76801	37.38	37.38
			5.51	11.18	5.98	6.56	6.34	96.64	37.7	41.08	6.2	5.76	21.41	68.8	5.9	21.41	21.41
			6.02	7.55	5.02	5.51	4.69	134.11	13.97	27.96	5.51	5.56	43.72	37.52	4.51202	43.72	43.72
			42.3	6.65	5.69	6.39	6.64	122.4	56.77	51.46	6.2	6.34	9.12	46.54	6.08	9.12	9.12
			7.29	7.12	5.37	6.91	5.52	135.76	25.04	7.32	5.67	5.51	57.67	52.63	5.53601	57.67	57.67
			18.15	7.04	5.56	6.46	5.71	119.14	49.84	6.79	4.3	5.51	95.36	48.34	5.58411	95.36	95.36
			30.96	6.77	5.77	6.29	4.63	136.17	53.58	7.45	5.8	5.02	16.01	62.37	5.704	16.01	16.01
% time 0			10% FBS					FBS + UAG					FBS + PIK3i
			100	100	100	100	100	100	100	100	100	100	100	100	100	100	100
		1	6.85563	8.43282	12.5799	0	0	34.6126	7.7078	13.2711	14.3785	19.4341	66.388	14.2776	21.4643	66.388	66.388
		2	8.47391	9.06755	14.7945	12.4101	13.1316	89.5558	33.5622	12.7423	13.1957	18.7811	33.0286	169.12	18.7366	33.0286	33.0286
		3	7.55198	15.6264	12.8995	11.0112	13.4414	88.3341	52.7757	16.4258	13.2421	21.7662	24.8171	34.8612	18.4972	24.8171	24.8171
		4	27.0891	14.1756	12.6484	11.0711	15.4433	91.6672	21.1536	12.6542	14.7032	17.2264	16.2748	69.8447	15.8622	16.2748	16.2748
		5	5.40408	16.8959	13.653	13.1095	15.1096	64.1657	28.1301	72.4004	14.3785	17.9105	9.32166	64.7529	19.6281	9.32166	9.32166
		6	5.90428	11.41	11.4612	11.0112	11.1773	89.0446	10.4238	49.2774	12.7783	17.2886	19.0352	35.3129	15.0106	19.0352	19.0352
		7	41.4869	10.0499	12.9909	12.7698	15.8246	81.2695	42.3593	90.6944	14.3785	19.7139	3.97074	43.8023	20.2269	3.97074	3.97074
		8	7.14986	10.7602	12.2603	13.8089	13.1554	90.1401	18.6838	12.9009	13.1494	17.1331	25.1089	49.5341	18.4171	25.1089	25.1089
		9	17.8011	10.6393	12.6941	12.9097	13.6082	79.105	37.1885	11.9669	9.97217	17.1331	41.5186	45.4965	18.5772	41.5186	41.5186
		10	30.3649	10.2312	13.1735	12.5699	11.0343	90.4123	39.9791	13.1301	13.4508	15.6095	6.97057	58.7012	18.976	6.97057	6.97057
