# Supplementary material for: Three-dimensional growth of breast cancer cells potentiates the anti-tumor effects of unacylated ghrelin and AZP-531
Source: eLife. 2020 Jul 15;9:e56913. doi: 10.7554/eLife.56913 (PMC7363447; doi:10.7554/eLife.56913)
Supplement: Figure 4—figure supplement 1—source data 1. [file elife-56913-fig4-figsupp1-data1.xlsx]

## Sheet: Figure S4a 
Raw data
LCC2	VC				E2
	0	10	100	1000	0	10	100	1000
	293	515	523	250	1208	797	873	501
	234	510	413	464	1580	1027	1130	484
	170	599	432	470	1441	979	1009	700

## Sheet: Figure S4b
Raw data
MDA-MB-231
	Set1		YFP (G1)			RFP (S/G2/M)			GFP (G1/S)			Total
		intensity theshold set	Above 350			Above 900			Above 300
			CM	CM=UAG		CM	CM=UAG		CM	CM=UAG
			63	53		82	34		655	536		800	623
			21	31		6	24		460	523		487	578
	Set2		YFP (G1)			RFP (S/G2/M)			GFP (G1/S)			Total
		intensity theshold set	Above 400			Above 700			above 300
			CM	CM=UAG		CM	CM=UAG		CM	CM=UAG
			16	124		60	240		409	479		485	843
			59	87		103	155		494	415		656	657
			MDA-MB 468
			G1			S/G2/M			G1/S
% CM			0	100		0	100		0	100
			7.875	8.50722		10.25	5.45746		81.875	86.0353
			4.31211	5.36332		1.23203	4.15225		94.4559	90.4844
			3.29897	14.7094		12.3711	28.4698		84.3299	56.8209
			8.9939	13.242		15.7012	23.5921		75.3049	63.1659

## Sheet: Figure S4c
Raw data
MCF7			G1 phase			S/G2/M phase			G1/S transition
		VC	86.8	86.8	93.6	3.14	4.93	1.13	9.06	7.12	4.89
		DAG 10pM	85.1	84	85.1	4.83	5.94	4.83	8.74	9.05	9.12
		DAG 100pM	84.2	81.7	84.7	4.33	5.83	5.27	10.3	11	8.84
		E2	75.1	77.3	75.1	11.7	13.9	10.3	11.6	6.99	12.5
		E2 +DAG 10pM	75.4	76.8	75	10.2	7.5	7.61	13.8	13.6	16.5
		E2+DAG 100pM	86.1	79.2	79.4	4.83	12.9	9.98	8.37	6.41	10.1

## Sheet: Figure S4d 
Raw data
MCF7		VC			E2
		0	10	100	0	10	100
		10.8	9.07	10.7	3.88	9.1	10.3
		8.96	8.27	10.2	4.09	10.7	10.1
		9.2	8.79	9.87	3.55	10.7	12.6

## Sheet: Figure S4e 
Raw data
MDA-MB-468			G1 phase			S/G2/M phase			G1/S transition
		VC	62.12	63.55	62.67	8.08	7.65	5.43	29.8	28.8	31.9
		DAG 10pM	60.6	62.1	61.7	12.6	10.7	12	26.8	27.2	26.3
		DAG 100pM	55.2	57.1	59.4	14.4	13.5	11.2	30.4	29.4	29.4
		CM	61.3	53.73	58.5	11.4	8.17	12.2	27.3	38.1	29.3
		CM +DAG 10pM	62.09	63.19	61.82	7.81	7.31	6.58	30.1	29.5	31.6
		CM +DAG 100pM	57.07	63.28	61.77	6.93	6.92	7.43	36	29.8	30.8

## Sheet: Figure S4f
Raw data
MDA-MB-468		VC			CM
		0	10	100	0	10	100
		10.6	11.6	10.2	6.9	9.67	8.85
		5.03	11.1	9.95	4.66	11.5	10.8
		10.7	10.4	10.4	5.65	11.1	10.6

## Sheet: Figure S4g 
Raw data
ZR75			G1 phase			S/G2/M phase			G1/S transition
		VC	75.52	76.74	77.1	7.14	7.34	7.2	17.3	15.8	15.6
		DAG 10pM	81.18	74.46	69.42	5.82	10.3	11.2	12.9	14.7	19.4
		DAG 100pM	68.88	66.5	65.06	11.7	14	14.9	19.4	19.3	20.6
		E2	69.78	65.89	68.17	9.25	10.5	9.64	20	23.6	21.2
		E2 +DAG 10pM	71.14	75.54	70.22	6.97	7.45	9.8	21.8	16.9	19.9
		E2+DAG 100pM	77.22	76.06	74.11	5.33	8.02	7.22	17.3	16.2	17.9

## Sheet: Figure S4h
Raw data
ZR75		VC			E2
		0	10	100	0	10	100
		27.1	19.8	24.7	16.2	31.5	22.6
		27.5	20	25.2	14.8	21.6	23.8
		22.4	18.8	24.7	22	31.4	24.4
