# Supplementary material for: Three-dimensional growth of breast cancer cells potentiates the anti-tumor effects of unacylated ghrelin and AZP-531
Source: eLife. 2020 Jul 15;9:e56913. doi: 10.7554/eLife.56913 (PMC7363447; doi:10.7554/eLife.56913)
Supplement: Figure 4—source data 1. [file elife-56913-fig4-data1.xlsx]

## Sheet: Figure 4a
Figure 4a
Cell number count		MCF7
Raw data		VC	UAG10	UAG100	UAG1000	E2	E2+UAG10	E2+UAG100	E2+UAG1000
		0	10	100	1000	0	10	100	1000
		235	175	228	211	608	524	51	84
		273	92	460	183	1075	114	462	311
		376	358	266	185	796	259	195	382

## Sheet: Figure 4b
Figure 4b		ZR75
Cell number count		VC	UAG10	UAG100	UAG1000	E2	E2+UAG10	E2+UAG100	E2+UAG1000
Raw data		0	10	100	1000	0	10	100	1000
		76	96	155	150	273	89	129	128
		32	102	155	167	344	79	158	143
		55	99	124	172	292	111	113	92

## Sheet: Figure 4c
Figure 4c
Cell number count		MDA-MB 468
Raw data		VC	UAG10	UAG100	UAG1000	CM	CM+UAG10	CM+UAG100	CM+UAG1000
		0	10	100	1000	0	10	100	1000
		9	29	21	79	55	35	38	22
		24	31	21	26	171	14	24	34
		32	11	38	17	74	51	60	21
		53	43	29	59	85	36	62	42
		57	57	41	88	98	95	62	26
		56	32	65	50	118	60	11	33

## Sheet: Figure 4d
Figure 4d
Cell number count
Raw data
Set1		YFP (G1)			RFP (S/G2/M)			GFP (G1/S)			Total
	intensity theshold set	Above 700			Above 650			Above 650
		CM	CM=UAG		CM	CM=UAG		CM	CM=UAG
		98	157		251	31		255	50		604	238
		105	215		199	51		347	43		651	309
Set2		YFP (G1)			RFP (S/G2/M)			GFP (G1/S)			non-transfected
	intensity theshold set	Above 500			Above 650			Above 200
		CM	CM=UAG		CM	CM=UAG		CM	CM=UAG
		380	550		255	111		755	386		1390	1047
		398	475		347	60		1089	386		1834	921
		MCF7
		G1			S/G2/M			G1/S
		CM	CM=UAG		CM	CM=UAG		CM	CM=UAG
% CM		0	100		0	100		0	100
		16.2252	65.9664		41.5563	13.0252		42.2185	21.0084
		16.129	69.5793		30.5684	16.5049		53.3026	13.9159
		27.3381	52.531		18.3453	10.6017		54.3165	36.8672
		21.7012	51.5744		18.9204	6.51466		59.3784	41.911

## Sheet: Figure 4e
Figure 4e
Cell number count
Raw data
Set1		YFP (G1)			RFP (S/G2/M)			GFP (G1/S)			Total
	intensity theshold set	Above 200			Above 500			Above 720
		CM	CM=UAG		CM	CM=UAG		CM	CM=UAG
		356	854		526	38		502	131		1384	1023
		336	856		1301	17		556	162		2193	1035
Set2		YFP (G1)			RFP (S/G2/M)			GFP (G1/S)			non-transfected
	intensity theshold set	Above 500			Above 2500			above 930
		CM	CM=UAG		CM	CM=UAG		CM	CM=UAG
		487	384		221	1		505	5		1213	390
		230	376		63	0		426	35		719	411
		MDA-MB 468
		G1			S/G2/M			G1/S
% CM		0	100		0	100		0	100
		25.7225	83.48		38.0058	3.71457		36.2717	12.8055
		15.3215	82.7053		59.3251	1.64251		25.3534	15.6522
		40.1484	98.4615		18.2193	0.25641		41.6323	1.28205
		31.9889	91.4842		8.76217	0		59.249	8.51582

## Sheet: Figure 4f
Figure 4f
Cell number count
Raw data		MCF7			MDA-MB 468			MDA-MB 231
		0	0	100	0	0	100	0	0	100
		31	1	11	30	6	64	63	5	11
		42	2	12	30	8	52	69	4	9
		23	2	14	21	14	42	89	4	6
