# Supplementary material for: Three-dimensional growth of breast cancer cells potentiates the anti-tumor effects of unacylated ghrelin and AZP-531
Source: eLife. 2020 Jul 15;9:e56913. doi: 10.7554/eLife.56913 (PMC7363447; doi:10.7554/eLife.56913)
Supplement: Figure 5—figure supplement 1—source data 1. [file elife-56913-fig5-figsupp1-data1.xlsx]

## Sheet: Figure S5d
Raw data
J110
		days post-injection	Nude (PBS)						Nude (DAG)
		0	108.147	135.816	74.925	113.724	84.216		60.016	83.1875	103.68	105.393	137.312
		1	156.426	184.96	156.645	189.484	166.518		53.391	22.05	53.958	93.492	78.652
		2	156.645	238.464	169.984	205.768	219.961		62.092	26.6805	48.668	126.96	56.448
		3	176.824	246.24	185.13	220.5	240.1		60.236	25.6	55.296	123.525	57.33
		4	358.858	346.8	277.255	336.2	332.8		102.528	67.4885	109.33	151.263	90.569
		5	384	370.881	298.08	366.102	375.45		110	67.76	113.132	152.5	91.008
		6	624.24	379.456	502.983	478.216	455.455		146.713	68.85	85.6745	259.47	99.144
		7	674.16	398.816	775.284	486.68	477.9		161.838	78.292	109.35	247.151	91.96

## Sheet: Figure S5e
Raw data			ER% case			Basal			Mesenchymal
			VC	CM	CM+UAG	VC	CM	CM+UAG	VC	CM	CM+UAG
			0	0	100	0	0	100	0	0	100
			174	320	318	155	429	222	384	1010	966
			183	340	291	246	357	288	440	1026	753
			191	382	280	208	429	288	569	900	1246
				347.333		401	484	211	548	744	621
							424.75			920
									453	957	967
									919	781	755
									804	1178	1246
									723	1024	720
										985
			ER% case			Basal			Mesenchymal
			VC	CM	CM+UAG	VC	CM	CM+UAG	VC	CM	CM+UAG
	In %		0	0	100	0	0	100	0	0	100
			50.096	92.1305	91.5547	36.492	101.001	52.266	41.7391	109.783	105
			52.6871	97.8887	83.7812	57.9164	84.0494	67.8046	47.8261	111.522	81.8478
			54.9904	109.981	80.6142	48.97	101.001	67.8046	61.8478	97.8261	135.435
						94.4085	113.949	49.6763	59.5652	80.8696	67.5
									45.9898	97.1574	98.1726
									93.2995	79.2893	76.6497
									81.6244	119.594	126.498
									73.401	103.959	73.0965
validation
			50.096	92.1305	91.5547	36.4921	101.001	52.266	41.7391	109.783	105
			52.6871	97.8887	83.7812	57.9164	84.0494	67.8046	47.8261	111.522	81.8478
			54.9904	109.981	80.6142	48.97	101.001	67.8046	61.8478	97.8261	135.435
						94.4085	113.949	49.6763	59.5652	80.8696	67.5
									45.9898	97.1574	98.1726
									93.2995	79.2893	76.6497
									81.6244	119.594	126.497
									73.401	103.959	73.0964
