# Supplementary material for: Three-dimensional growth of breast cancer cells potentiates the anti-tumor effects of unacylated ghrelin and AZP-531
Source: eLife. 2020 Jul 15;9:e56913. doi: 10.7554/eLife.56913 (PMC7363447; doi:10.7554/eLife.56913)
Supplement: Figure 5—source data 1. [file elife-56913-fig5-data1.xlsx]

## Sheet: Figure 5a
Raw data
MCF7	days post-injection	Saline						50μg/kg [DAG]						100μg/kg [DAG]
	0	194.208	197.173	190.44	190.125	193.43	194.4	190.464	192.2	191.664	191.631	194.481	199.761	196	196.599	194.94	190.44	191.296	190.464
	3	207.103	237.141	221.804	250.463	236.155	222.206	120.313	139.707	153.164	117.649	139.15	103.933	143.258	131.4	156.832	147.456	169.4	106.742
	7	253.125	272.812	255.88	339.2	345.938	230.262	119.487	118.976	151.078	115	146.205	103.933	167.936	150.822	198	148.838	212.81	180.774
	10	313.45	284.062	292.032	356.372	406.4	232.375	102.74	171.564	197.966	97.5375	165.347	87.5	165.888	196	199.65	200.9	189.28	163.84
	14	400.01	348.8	363.312	406.78	459.27	234.488	110.864	180	187.2	121.68	176.4	140.4	157.696	142.2	195.113	225	210.238	112.896
	17	444.36	369.82	371.712	433.664	542.08	234.488	82.524	195.352	174.6	85.698	143.688	134.56	171.113	169	193.821	294.4	208.725	131.4
	21	465.75	436.354	396.05	433.664	685.9	236.6	118.098	176.4	125.001	78.975	121.251	110.412	189.486	244.688	204.12	372.6	235.45	115.182
	24	501.642	454.14	405	437.536	715.084	258.944	112.5	198	106.844	76	141.12	86.25	220.5	233.28	208.725	480.2	237.162	116.64
	28	600	513.422	427.432	437.536	750	258.944	120.05	189.771	151.38	47.616	121.68	100.138	218.05	232.75	222.556	523.418	222.656	126.514

## Sheet: Figure 5b
Raw data
ZR75	days post-injection	Saline					50ug/kg [DAG]					100ug/kg [DAG]
	0	191.631	191.1	199.119	194.481	131.22	217.186	194.4	193.315	191.808	190.125	191.808	191.558	188.538	196.608	188.416
	3	273.757	219.04	220.32	235.673	196.608	188.384	91.854	154.548	152.46	176.62	107.217	111.6	116.614	145.8	172.651
	7	337.662	246.054	278.842	281.75	252.05	210.237	131.072	191.455	186.624	215.016	124.653	126.514	146.853	160.2	169.2
	10	415.438	248.368	285.404	303.918	266.45	220.28	171.5	229.376	207.36	251.896	104.43	104.284	144	163.724	162
	14	422.663	268.8	295.856	346.788	269.115	230.262	231.04	236.6	275.684	265.696	115.2	117	180.336	165.347	149.698
	17	420.229	291.2	332.35	364.135	269.115	228.15	243.089	238.14	268.8	247.798	115.2	143.36	213.16	127.05	169.305
	21	439.615	295.856	416.295	426.275	296.45	265.88	252.486	285.66	313.992	337.895	145.408	135.816	198.45	153	168.828
	24	409.896	303.116	473.85	440.062	397.375	294.899	261.612	257.725	348.48	338.688	142.228	157.216	221.778	151.2	200.688
	28	507.84	293.486	531.609	458.552	516.906	326.25	314.928	244.094	345.744	375.7	219.488	199.838	220.5	146.205	200.688

## Sheet: Figure 5c
Raw data
J110	days post-injection	FVB (PBS)					FVB (100ug/kg DAG)					FVB (200ug/kg DAG)
	-2	37.026	53.6	43.008	56.066	47.652	40.176	54.756	60.516	68.0805	47.9115	36.504	73.0355	47.1495	59.976	63.48
	-1	40.46	58.835	80	62.475	53.235	64	57.6	67.24	72	87.5	55.47	72	60.75	87.5	84.64
	0	72.2475	75.809	99.846	83.592	88.2525	118.75	69.696	68.921	85.184	126.15	105	93.15	76.25	97.5	87.814
	1	89.6765	155.48	131.328	87.362	181.8	72.9	62.814	26.95	88.088	42.588	116.463	79.8525	22.542	62.261	106.25
	2	128.75	208.896	242.76	185.193	294.899	82.5	98.9215	35.64	62.814	46.225	122.4	70.034	32	84.0375	88.872
	3	139.256	269.5	256.632	191.691	384	144	72	48	72	46.225	111.925	80	40	50.4	112.5
	4	143.312	368	265.88	207.936	484	214.245	67.6875	67.4885	123.264	39.7535	111.925	135.936	62.5	60.984	209.484
	5	172.425	390.5	286.688	261.954	491.744	259.7	88.088	52.6965	103.75	62.5	92.5	147.5	55.296	30.375	167.323
	6	180.32	432.666	330.185	290.816	514.865	278.4	120.947	90.4	112.659	100.048	137.677	137.5	70.688	56.3945	226.512
	7	196.2	466.012	382.5	317.988	538.628	287.557	123.547	96.1875	141.25	94.8395	188.012	223.2	78.75	75	257.25

## Sheet: Figure 5d
Raw data
	MCF7 cells - apoptotic nucleus
	PBS							Low DAG							High DAG
	MCF 1-4	Field 1	Field 2	Field 3	Field 4	Total	%	MCF 2-1	Field 1	Field 2	Field 3	Field 4	Total	%	MCF 3-4	Field 1	Field 2	Field 3	Field 4	Total	%
	Total nucleus	307	375	358	273	1313	19.345	Total nucleus	249	309	288	323	1169	28.9991	Total nucleus	215	115	149	202	681	28.6344
	Apoptotic nuclei	97	51	57	49	254		Apoptotic nuclei	65	103	81	90	339		Apoptotic nuclei	50	31	47	67	195
	PBS							Low DAG							High DAG
	MCF 4-1	Field 1	Field 2	Field 3	Field 4	Total	%	MCF 2-3	Field 1	Field 2	Field 3	Field 4	Total	%	MCF 6-4	Field 1	Field 2	Field 3	Field 4	Total	%
	Total nucleus	346	347	293	281	1267	17.2849	Total nucleus	240	283	276	331	1130	24.6903	Total nucleus	334	290	234	294	1152	25.0868
	Apoptotic nuclei	65	59	56	39	219		Apoptotic nuclei	56	51	72	100	279		Apoptotic nuclei	75	82	67	65	289
	PBS							Low DAG							High DAG
	MCF 4-2	Field 1	Field 2	Field 3	Field 4	Total	%	MCF 5-3	Field 1	Field 2	Field 3	Field 4	Total	%	MCF 6-5	Field 1	Field 2	Field 3	Field 4	Total	%
	Total nucleus	292	232	230	257	1011	24.8269	Total nucleus	360	385	369	288	1402	20.7561	Total nucleus	314	371	343	355	1383	28.1996
	Apoptotic nuclei	64	67	52	68	251		Apoptotic nuclei	77	64	68	82	291		Apoptotic nuclei	88	93	113	96	390
	PBS
	MCF 4-5	Field 1	Field 2	Field 3	Field 4	Total	%
	Total nucleus	299	276	299	327	1201	19.4838
	Apoptotic nuclei	57	44	47	86	234
	in %	PBS	50μg/kg [DAG]	100μg/kg [DAG]
		19.345	28.9992	28.6344
		17.2849	24.6903	25.0868
		24.8269	20.7561	28.1996
		19.4838

## Sheet: Figure 5e
Raw data
ZR75_Apoptotic nuclei
Sample 7-1 PBS	Field 1	Field 2	Field 3	Total	% cells with apoptotic nucleus		Sample 10-1 Low DAG	Field 1	Field 2	Field 3	Total	% cells with apoptotic nucleus		Sample 11-4 High DAG	Field 1	Field 2	Field 3	Total	% cells with apoptotic nucleus
Total number of cells	338	328	331	997	7.92377		Total number of cells	265	308	337	910	20.989		Total number of cells	298	328	283	909	16.8317
Number of cells with apoptotic nucleus	25	29	25	79			Number of cells with apoptotic nucleus	59	53	79	191			Number of cells with apoptotic nucleus	56	54	43	153
Sample 9-1 PBS	Field 1	Field 2	Field 3	Total	% cells with apoptotic nucleus		Sample 10-3 Low DAG	Field 1	Field 2	Field 3	Total	% cells with apoptotic nucleus		Sample 12-1 High DAG	Field 1	Field 2	Field 3	Total	% cells with apoptotic nucleus
Total number of cells	234	287	243	764	12.3037		Total number of cells	331	363	414	1108	14.5307		Total number of cells	238	278	307	823	20.6561
Number of cells with apoptotic nucleus	32	33	29	94			Number of cells with apoptotic nucleus	41	55	65	161			Number of cells with apoptotic nucleus	56	46	68	170
Sample 9-5 PBS	Field 1	Field 2	Field 3	Total	% cells with apoptotic nucleus		Sample 10-4 Low DAG	Field 1	Field 2	Field 3	Total	% cells with apoptotic nucleus		Sample 12-5 High DAG	Field 1	Field 2	Field 3	Total	% cells with apoptotic nucleus
Total number of cells	282	286	326	894	10.7383		Total number of cells	250	266	306	822	16.545		Total number of cells	376	334	336	1046	14.6272
Number of cells with apoptotic nucleus	29	32	35	96			Number of cells with apoptotic nucleus	50	39	47	136			Number of cells with apoptotic nucleus	46	49	58	153
		in %	PBS	50μg/kg [DAG]	100μg/kg [DAG]
			7.92377	20.989	16.8317
			12.3037	14.5307	20.6561
			10.7383	16.545	14.6272

## Sheet: Figure 5f
Raw data	J110_Apoptotic nuclei
	PBS								DAG
	2-169	Field 1	Field 2	Field 3	Field 4	Total	%		1-194	Field 1	Field 2	Field 3	Field 4	Total	%
	Total cells number	378	246	351	385	1360	9.33824		Total cells number	442	485	421	304	1652	11.7433
	Number of apoptotic nuclei	28	39	34	26	127			Number of apoptotic nuclei	59	46	40	49	194
	PBS								DAG
	2-175	Field 1	Field 2	Field 3	Field 4	Total	%		1-195	Field 1	Field 2	Field 3	Field 4	Total	%
	Total cells number	143	93	95	no 4th images	331	7.25076		Total cells number	288	223	223	324	1058	17.2968
	Number of apoptotic nuclei	8	11	5		24			Number of apoptotic nuclei	55	35	39	54	183
	PBS								DAG
	2-181	Field 1	Field 2	Field 3	Field 4	Total	%		1-196	Field 1	Field 2	Field 3	Field 4	Total	%
	Total cells number	285	315	278	259	1137	8.70712		Total cells number	238	346	376	311	1271	16.4437
	Number of apoptotic nuclei	17	29	31	22	99			Number of apoptotic nuclei	24	49	89	47	209
	PBS								DAG
	2-184	Field 1	Field 2	Field 3	Field 4	Total	%		1-198	Field 1	Field 2	Field 3	Field 4	Total	%
	Total cells number	380	272	339	386	1377	10.4575		Total cells number	366	301	323	286	1276	17.3197
	Number of apoptotic nuclei	61	32	28	23	144			Number of apoptotic nuclei	51	49	66	55	221
	PBS								DAG
	2-193	Field 1	Field 2	Field 3	Field 4	Total	%		1-199	Field 1	Field 2	Field 3	Field 4	Total	%
	Total cells number	301	267	345	333	1246	8.50722		Total cells number	320	207	202	251	980	18.1633
	Number of apoptotic nuclei	20	21	30	35	106			Number of apoptotic nuclei	62	41	34	41	178
		in %	PBS	DAG
			9.33823	11.7433
			7.25075	17.2968
			8.70712	16.4438
			10.4575	17.3197
			8.50722	18.1633

## Sheet: Figure 5g
Raw data		ER% case 2			Basal 4013-TG3			Mesenchymal-3204-TG6
		VC	CM	CM+UAG	VC	CM	CM+UAG	VC	CM	CM+UAG
		3413	18018	2378	228	468	195	234	969	1161
		2996	13689	3533	290	472	262	358	938	317
		3219	12923	9511	357	438	244	234	908	326
			14876.7		274	447	308	184	859	1100
						456.25			918.5
									418	286
								187	342	186
								152	219	782
								128	303	383
									320.5
		ER% case 2			Basal 4013-TG3			Mesenchymal-3204-TG6
		VC	CM	CM+UAG	VC	CM	CM+UAG	VC	CM	CM+UAG
in %		0	0	100	0	0	100	0	0	100
		22.942	121.116	15.9848	49.9726	102.575	42.7397	25.4763	105.498	126.402
		20.1389	92.0166	23.7486	63.5616	103.452	57.4247	38.9766	102.123	34.5128
		21.6379	86.8676	63.9323	78.2466	96	53.4794	25.4763	98.8568	35.4926
					60.0548	97.9726	67.5069	20.0327	93.522	119.76
									130.421	89.2356
								58.3463	106.708	58.0343
								47.4259	68.3307	243.994
								39.9376	94.5398	119.501
Validation
		22.942	121.116	15.9848	49.9726	102.575	42.7397	25.4763	105.498	126.402
		20.1389	92.0166	23.7486	63.5616	103.452	57.4247	38.9766	102.123	34.5128
		21.6379	86.8676	63.9323	78.2466	96	53.4795	25.4763	98.8568	35.4927
					60.0548	97.9726	67.5068		130.421	89.2356
								58.3463	106.708	58.0343
								47.4259	68.3307	243.994
								39.9376	94.5398	119.501
