# Supplementary material for: Three-dimensional growth of breast cancer cells potentiates the anti-tumor effects of unacylated ghrelin and AZP-531
Source: eLife. 2020 Jul 15;9:e56913. doi: 10.7554/eLife.56913 (PMC7363447; doi:10.7554/eLife.56913)
Supplement: Figure 6—source data 1. [file elife-56913-fig6-data1.xlsx]

## Sheet: Figure 6a
Raw data													Validation
	Dose response			[AZP]M												[AZP]M
	AZP set 1	VC	10% FBS	1e-18	1e-16	1e-15	1e-13	1e-12	1e-10	1e-09	1e-07			VC	10% FBS	1e-18	1e-16	1e-15	1e-13	1e-12	1e-10	1e-09	1e-07
		619	1391	1569	1279	1201	1172	1000	642	221	796				1509
		515	1641	1527	1317	1243	1141	1060	732	515	754			41.0205	92.1803	103.976	84.7581	79.5891	77.6673	66.2691	42.5447	14.6455	52.7502
		577	1495	1535	1356	1222	1154	1068	727	386	801			34.1286	108.748	101.193	87.2763	82.3724	75.613	70.2452	48.5089	34.1286	49.9669
														38.2372	99.0722	101.723	89.8608	80.9808	76.4745	70.7753	48.1776	25.5799	53.0815
				[DOX]M												[DOX]M
		VC	10% FBS	1.5×10-13	1.5×10-12	1.5×10-11	1.5×10-10	1.5×10-9	1.5×10-8	1.5×10-7	1.5×10-6			VC	10% FBS	1.5×10-13	1.5×10-12	1.5×10-11	1.5×10-10	1.5×10-9	1.5×10-8	1.5×10-7	1.5×10-6
		615	1860	1806	1754	1650	1566	1411	1329	1207	982				1863.67
		514	1839	1865	1736	1640	1554	1432	1321	1290	901			32.9994	99.8031	96.9056	94.1154	88.535	84.0278	75.7108	71.3109	64.7647	52.6917
		457	1892	1866	1723	1615	1523	1487	1309	1212	957			27.58	98.6763	100.071	93.1495	87.9984	83.3839	76.8376	70.8816	69.2183	48.3455
														24.5215	101.52	100.125	92.452	86.657	81.7205	79.7888	70.2378	65.033	51.3503
			[AZP531] M	AZP531			doxorubicin
			1e-25	92.1803	108.748	99.0722
			1e-18	103.976	101.193	101.723
			1e-16	84.7581	87.2763	89.8608
			1e-15	79.5891	82.3724	80.9808
			1e-13	77.6673	75.613	76.4745
			1e-12	66.2691	70.2452	70.7753
			1e-10	42.5447	48.5089	48.1776
			1e-09	14.6455	34.1286	25.5799
			1e-07	52.7502	49.9669	53.0815
			1e-25				99.8031	98.6763	101.52
			1.5e-13				96.9056	100.071	100.125
			1.5e-12				94.1154	93.1495	92.452
			1.5e-11				88.535	87.9984	86.657
			1.5e-10				84.0278	83.3839	81.7205
			1.5e-09				75.7108	76.8376	79.7888
			1.5e-08				71.3109	70.8816	70.2378
			1.5e-07				64.7647	69.2183	65.033
			1.5e-06				52.6917	48.3455	51.3503

## Sheet: Figure 6b
Raw data													Validation
	Dose response			[AZP]M												[AZP]M
	AZP set 1	VC	10% FBS	1e-18	1e-16	1e-15	1e-13	1e-12	1e-10	1e-09	1e-07			VC	10% FBS	1e-18	1e-16	1e-15	1e-13	1e-12	1e-10	1e-09	1e-07
		3836	13873	7434	5713	5299	5068	4918							13234.7
		3901	14318	7549	5728	5290	5168	4864						28.9845	104.823	56.1706	43.1669	40.0388	38.2934	37.16
		3868	11513	7419	5531	5282	5059	4816						29.4756	108.186	57.0396	43.2803	39.9708	39.049	36.752
														29.2263	86.9912	56.0573	41.7917	39.9103	38.2254	36.3893
																[DOX]M
	DOX			[DOX]M										VC	10% FBS	1.5×10-13	1.5×10-12	1.5×10-11	1.5×10-10	1.5×10-9	1.5×10-8	1.5×10-7	1.5×10-6
		VC	10% FBS	1.5×10-13	1.5×10-12	1.5×10-11	1.5×10-10	1.5×10-9	1.5×10-8	1.5×10-7	1.5×10-6				3626.33
		1552	3658	2713	1651	1274	1067	1014	760	623	494			42.7981	100.873	74.8139	45.5281	35.1319	29.4237	27.9621	20.9578	17.1799	13.6226
		1517	3664	2680	1750	1267	1124	988	744	635	474			41.8329	101.039	73.9039	48.2581	34.9389	30.9955	27.2452	20.5166	17.5108	13.0711
		1500	3557	2641	1890	1363	1078	802	778	722	471			41.3641	98.0881	72.8284	52.1188	37.5862	29.727	22.116	21.4542	19.9099	12.9883
In %		[AZP531] M	AZP531			doxorubicin
		1e-25	104.823	108.186	86.9912
		1e-18	56.1707	57.0396	56.0573
		1e-16	43.1669	43.2803	41.7918
		1e-15	40.0388	39.9708	39.9103
		1e-13	38.2934	39.0489	38.2254
		1e-12	37.16	36.752	36.3893
		1e-10
		1e-09
		1e-07
		1e-25				100.873	101.039	98.0881
		1.5e-13				74.8139	73.9039	72.8285
		1.5e-12				45.5281	48.2582	52.1188
		1.5e-11				35.1319	34.9389	37.5862
		1.5e-10				29.4237	30.9955	29.727
		1.5e-09				27.9622	27.2452	22.116
		1.5e-08				20.9578	20.5166	21.4542
		1.5e-07				17.1799	17.5108	19.9099
		1.5e-06				13.6226	13.0711	12.9883

## Sheet: Figure 6c
Raw data			[AZP]M									Validation	AZP set 1	VC	10% FBS	1e-18	1e-16	1e-15	1e-13	1e-12	1e-10	1e-09	1e-07
	VC	10% FBS	1e-18	1e-16	1e-15	1e-13	1e-12	1e-10	1e-09	1e-07					1496
	291	1448	1109	1149	1077	385	246							19.4519	96.7914	74.131	76.8048	71.992	25.7353	16.4439
	197	1545	1268	1067	715	151	221							13.1684	103.275	84.7594	71.3235	47.7941	10.0936	14.7727
	287	1495	1231	1028	801	192	215							19.1845	99.9332	82.2861	68.7166	53.5428	12.8342	14.3717
			[DOX]M
	VC	10% FBS	1.5×10-13	1.5×10-12	1.5×10-11	1.5×10-10	1.5×10-9	1.5×10-8	1.5×10-7	1.5×10-6
	282	1727	1486	1268	982	959	346	231	240	122
	260	1747	1499	1137	1156	536	239	302	155	223			[DOX]M	VC	10% FBS	1.5×10-13	1.5×10-12	1.5×10-11	1.5×10-10	1.5×10-9	1.5×10-8	1.5×10-7	1.5×10-6
	330	1788	1424	1359	1080	609	259	178	153	187					1754
														16.0775	98.4607	84.7206	72.2919	55.9863	54.675	19.7263	13.1699	13.683	6.95553
														14.8233	99.6009	85.4618	64.8233	65.9065	30.5587	13.626	17.2178	8.83694	12.7138
														18.8141	101.938	81.1859	77.48	61.5735	34.7206	14.7662	10.1482	8.72292	10.6613
In %
			[AZP531] M	AZP531			doxorubicin
			1e-25	96.7914	103.275	99.9332
			1e-18	74.131	84.7594	82.2861
			1e-16	76.8048	71.3235	68.7166
			1e-15	71.992	47.7941	53.5428
			1e-13	25.7353	10.0936	12.8342
			1e-12	16.4439	14.7727	14.3717
			1e-10
			1e-09
			1e-07
			1e-25				98.4607	99.6009	101.938
			1.5e-13				84.7206	85.4618	81.1859
			1.5e-12				72.2919	64.8233	77.4801
			1.5e-11				55.9863	65.9065	61.5735
			1.5e-10				54.675	30.5587	34.7206
			1.5e-09				19.7263	13.626	14.7662
			1.5e-08				13.1699	17.2178	10.1482
			1.5e-07				13.683	8.83694	8.72292
			1.5e-06				6.95553	12.7138	10.6614

## Sheet: Figure 6d
cAMP assay
		STD (M)						Interpolated X replicates	STD (M) (Interpolated)	Data Set-A (Entered)			Transform	STD (M) (Interpolated)	Data Set-A (Entered)
	STD1	0.0001	15320					SM	-7.9058	1478000			SM	1.24221e-08	1478000			FSK	2.02624e-07	2.87669e-07	2.61767e-07	2.19312e-07	2.03731e-07	2.36959e-07
	STD2	1e-05	76480					SM	-7.9785	1548000			SM	1.05075e-08	1548000			UAG 10pM	1.68657e-07	1.90754e-07	2.22863e-07
	STD3	1e-06	213900					SM	-7.66696	1246000			SM	2.15298e-08	1246000			UAG 100pM	1.25681e-07	1.3687e-07	1.33295e-07
	STD4	1e-07	654600					FSK	-6.69331	477200			FSK	2.02624e-07	477200			UAG 1000pM	9.48966e-08	8.16751e-08	1.18442e-07
	STD5	1e-08	1586000					FSK	-6.54111	399400			FSK	2.87669e-07	399400			AZP 10pM	1.61096e-07	2.10466e-07	2.36959e-07
	STD6	1e-09	2301000					FSK	-6.58208	419200			FSK	2.61767e-07	419200			AZP 100pM	1.25857e-07	1.21989e-07	1.8496e-07
	STD7	1e-10	2626000					UAG	-7.95036	1521000			UAG	1.12108e-08	1521000			AZP 1000pM	7.2159e-08	7.78114e-08	9.18321e-08
	STD8	0	2613000					UAG	-8.1306	1691000			UAG	7.40282e-09	1691000
	SM		1478000	1548000	1246000			UAG	-7.79159	1367000			UAG	1.61589e-08	1367000
	FSK		477200	399400	419200			FSK+UAG 10 pM	-6.77299	522700			FSK+UAG 10 pM	1.68657e-07	522700
	UAG		1521000	1691000	1367000			FSK+UAG 10 pM	-6.71953	491800			FSK+UAG 10 pM	1.90754e-07	491800
	FSK+UAG 10 pM		522700	491800	454900			FSK+UAG 10 pM	-6.65196	454900			FSK+UAG 10 pM	2.22863e-07	454900
	FSK+UAG 100pM		602700	578600	586000			FSK+UAG 100pM	-6.90073	602700			FSK+UAG 100pM	1.25681e-07	602700
	FSK+UAG 1000pM		687300	735700	619900			FSK+UAG 100pM	-6.86369	578600			FSK+UAG 100pM	1.3687e-07	578600
	SM		1564000	1361000	1267000			FSK+UAG 100pM	-6.87518	586000			FSK+UAG 100pM	1.33295e-07	586000
	FSK		458600	475900	441000			FSK+UAG 1000pM	-7.02275	687300			FSK+UAG 1000pM	9.48966e-08	687300
	AZP		1122000	1285000	1308000			FSK+UAG 1000pM	-7.08791	735700			FSK+UAG 1000pM	8.16751e-08	735700
	FSK+AZP 10 pM		534600	468200	441000			FSK+UAG 1000pM	-6.92649	619900			FSK+UAG 1000pM	1.18442e-07	619900
	FSK+AZP 100pM		602300	611300	499400			SM	-7.99524	1564000			SM	1.01102e-08	1564000
	FSK+AZP 1000pM		777300	751800	697700			SM	-7.78543	1361000			SM	1.63898e-08	1361000
								SM	-7.68868	1267000			SM	2.04794e-08	1267000
								FSK	-6.65894	458600			FSK	2.19312e-07	458600
								FSK	-6.69094	475900			FSK	2.03731e-07	475900
								FSK	-6.62533	441000			FSK	2.36959e-07	441000
								AZP	-7.53704	1122000			AZP	2.90376e-08	1122000
								AZP	-7.70726	1285000			AZP	1.96219e-08	1285000
								AZP	-7.73095	1308000			AZP	1.85801e-08	1308000
								FSK+AZP 10 pM	-6.79291	534600			FSK+AZP 10 pM	1.61096e-07	534600
								FSK+AZP 10 pM	-6.67682	468200			FSK+AZP 10 pM	2.10466e-07	468200
								FSK+AZP 10 pM	-6.62533	441000			FSK+AZP 10 pM	2.36959e-07	441000
								FSK+AZP 100pM	-6.90012	602300			FSK+AZP 100pM	1.25857e-07	602300
								FSK+AZP 100pM	-6.91368	611300			FSK+AZP 100pM	1.21989e-07	611300
								FSK+AZP 100pM	-6.73292	499400			FSK+AZP 100pM	1.8496e-07	499400
								FSK+AZP 1000pM	-7.14171	777300			FSK+AZP 1000pM	7.2159e-08	777300
								FSK+AZP 1000pM	-7.10896	751800			FSK+AZP 1000pM	7.78114e-08	751800
								FSK+AZP 1000pM	-7.03701	697700			FSK+AZP 1000pM	9.18321e-08	697700
								Paper figure data
								Interpolated X replicates	STD (M) (Interpolated)	Data Set-A (Entered)			Transform	STD (M) (Interpolated)	Data Set-A (Entered)
								FSK	-6.69331	477200			FSK	2.02624e-07	477200
								FSK	-6.54111	399400			FSK	2.87669e-07	399400
								FSK	-6.58208	419200			FSK	2.61767e-07	419200
								FSK+UAG 10 pM	-6.77299	522700			FSK+UAG 10 pM	1.68657e-07	522700
								FSK+UAG 10 pM	-6.71953	491800			FSK+UAG 10 pM	1.90754e-07	491800
								FSK+UAG 10 pM	-6.65196	454900			FSK+UAG 10 pM	2.22863e-07	454900
								FSK+UAG 100pM	-6.90073	602700			FSK+UAG 100pM	1.25681e-07	602700
								FSK+UAG 100pM	-6.86369	578600			FSK+UAG 100pM	1.3687e-07	578600
								FSK+UAG 100pM	-6.87518	586000			FSK+UAG 100pM	1.33295e-07	586000
								FSK+UAG 1000pM	-7.02275	687300			FSK+UAG 1000pM	9.48966e-08	687300
								FSK+UAG 1000pM	-7.08791	735700			FSK+UAG 1000pM	8.16751e-08	735700
								FSK+UAG 1000pM	-6.92649	619900			FSK+UAG 1000pM	1.18442e-07	619900
								FSK	-6.65894	458600			FSK	2.19312e-07	458600
								FSK	-6.69094	475900			FSK	2.03731e-07	475900
								FSK	-6.62533	441000			FSK	2.36959e-07	441000
								FSK+AZP 10 pM	-6.79291	534600			FSK+AZP 10 pM	1.61096e-07	534600
								FSK+AZP 10 pM	-6.67682	468200			FSK+AZP 10 pM	2.10466e-07	468200
								FSK+AZP 10 pM	-6.62533	441000			FSK+AZP 10 pM	2.36959e-07	441000
								FSK+AZP 100pM	-6.90012	602300			FSK+AZP 100pM	1.25857e-07	602300
								FSK+AZP 100pM	-6.91368	611300			FSK+AZP 100pM	1.21989e-07	611300
								FSK+AZP 100pM	-6.73292	499400			FSK+AZP 100pM	1.8496e-07	499400
								FSK+AZP 1000pM	-7.14171	777300			FSK+AZP 1000pM	7.2159e-08	777300
								FSK+AZP 1000pM	-7.10896	751800			FSK+AZP 1000pM	7.78114e-08	751800
								FSK+AZP 1000pM	-7.03701	697700			FSK+AZP 1000pM	9.18321e-08	697700

## Sheet: Figure 6e
Raw data
	days post-injection	PBS								AZP
	-42*	22.43792*	28.71635*	44.57963*	15.59062*	11.48821*	57.87648*	31.04361*	6.367397*	12.76358*	24.41664*	38.77272*	26.5084*	24.41664*	18.80703*	50.93917*	22.43792*	14.13*
	-35*	50.93917*	65.41667*	54.33404*	31.04361*	24.41664*	69.42069*	38.77272*	18.80703*	22.43792*	36.06866*	82.40616*	41.60866*	57.87648*	41.60866*	61.56964*	24.41664*	26.5084*
	-28*	69.42069*	97.66656*	77.9123*	38.77272*	44.57963*	102.1086*	61.56964*	24.41664*	31.04361*	50.93917*	110.5202*	54.33404*	96.91767*	65.41667*	82.40616*	28.71635*	38.77272*
	-21*	96.91767*	109.9586*	94.61448*	50.93917*	77.9123*	137.1887*	87.06958*	36.06866*	47.68875*	54.33404*	134.3653*	69.42069*	124.725*	82.40616*	107.4817*	33.49333*	44.57963*
	-14*	120.2337*	140.2073*	115.6211*	73.58485*	113.04*	156.9869*	102.1086*	44.57963*	65.41667*	87.06958*	160.768*	77.9123*	154.3373*	91.90571*	130.8579*	50.93917*	61.56964*
	-7*	147.4748*	173.2526*	150.877*	96.91767*	136.7951*	186.3318*	130.8579*	65.41667*	91.90571*	107.4817*	198.4313*	96.91767*	185.5902*	107.4817*	159.198*	82.40616*	96.91767*
	0	192.325	204.31	179.098	137.189	183.912	237.859	171.92	96.9177	118.787	138.807	236.028	107.482	253.162	137.189	191.172	113.04	122.055
	3	183.912	236.028	197.336	143.72	181.309	273.821	187.307	91.9057	130.858	161.409	266.517	113.04	266.004	150.456	228.226	102.109	153.706
	7	219.75	264.938	229.517	164.134	208.111	304.789	211.611	114.432	96.9177	140.207	282.6	87.0696	192.638	124.725	242.707	58.5312	119.714
	10	246.457	284.141	253.785	187.939	259.05	342.498	242.629	131.164	73.5849	111.6	300.976	61.5696	149.552	96.9177	259.362	41.6087	105.035
	14	283.372	313.548	291.667	212.84	314.837	383.187	285.462	157.86	57.8765	84.3938	320.08	38.7727	117.321	87.0696	272.248	33.4933	89.6726
	17	304.789	339.925	333.058	224.24	370.546	456.238	310.282	184.651	47.6887	90.566	299.255	24.4166	102.245	69.4207	270.825	50.9392	119.713
	21	355.422	390.928	388.189	252.188	410.387	500.647	324.885	206.802	44.5796	96.1405	253.785	41.6087	88.4774	91.9057	217.968	73.5849	110.52
	24	411.183	431.114	437.706	297.217	457.157	562.923	361.879	230.602	61.5696	101.433	221.602	69.4207	89.1509	107.482	164.092	88.2026	99.7343
	28	409.322	469.526	466.21	338.893	505.37	559.473	411.955	247.275	91.9057	124.995	237.859	96.9177	113.921	124.725	159.68	105.035	91.9811

## Sheet: Figure 6f
Raw data
	Days	Saline						200 ug/kg AZP
	-1	60.84	111.25	66.4	64.715	50.9535	80.4315	42.875	37.044	40.8	156.645	80.688
	0	131.144	138.51	75.9375	82.369	83.025	163.072	47.775	113.49	78.416	180.666	96.8
	1	150.281	239.616	119.556	158.368	137.052	245.191	57.6	71.7925	66.3255	163.154	110.45
	2	166.212	303.264	151.38	198	176.418	285.12	52.6965	65.596	77.184	165.699	114.264
	3	193.43	346.846	171	207	221.043	314.87	38.5875	87.5	84.64	168.2	111.375
	4	347.726	484.075	282.296	216.21	307.084	355.94	40.824	118.976	126	247.384	122.6
	5	385.385	554.47	323.438	235.52	330.75	404.32	43.2	158.4	100	262.15	111.375
	6	419.2	588.248	384	406.802	433.698	591.3	38.988	182.272	122.472	440.896	163.296
	7	448	501.106	468.512	437.113	529.984	611.55	36.1	160.2	105	402.188	166.375
